# Supplementary material for: Cluster halogenation of adamantane and its derivatives with bromine and iodine monochloride
Source: Royal Society of Chemistry journal article supplement (doi:10.1039/d2ob01455f), 2022-01-01
Supplement: d2ob01455f1.pdf [file d2ob01455f1.pdf]

**Cluster halogenation of adamantane and its derivatives with bromine and iodine monochloride**

Andrey V. Shernyukov, George E. Salnikov, Vyacheslav I. Krasnov and Alexander M. Genaev\*

Supporting Information

Contents

|                                                                                                                                               | Page |
|-----------------------------------------------------------------------------------------------------------------------------------------------|------|
| <sup>1</sup> H NMR spectra of the reaction mixtures for the halogenation reactions .....                                                      | 2    |
| AdH + Br <sub>2</sub> .....                                                                                                                   | 2    |
| AdH + ICl .....                                                                                                                               | 2    |
| AdCl + ICl .....                                                                                                                              | 3    |
| AdBr + ICl .....                                                                                                                              | 3    |
| AdCl + Br <sub>2</sub> .....                                                                                                                  | 4    |
| AdOH + Br <sub>2</sub> .....                                                                                                                  | 4    |
| AdOH + ICl .....                                                                                                                              | 5    |
| Quantum chemical calculations .....                                                                                                           | 6    |
| AdH-Br <sub>2</sub> , TS1 and AdBr-HBr (Fig. 2 in main text) .....                                                                            | 6    |
| AdH-2Br <sub>2</sub> , TS2, Ad <sup>+</sup> Br <sub>3</sub> <sup>-</sup> -HBr, TS2' and AdBr-HBr-Br <sub>2</sub> (Fig. 2 in main text) .....  | 7    |
| AdH-3Br <sub>2</sub> , TS3, Ad <sup>+</sup> Br <sub>5</sub> <sup>-</sup> -HBr, TS3' and AdBr-HBr-2Br <sub>2</sub> (Fig. 2 in main text) ..... | 10   |
| AdH+ClI(2.8), TS(34.4) and AdCl+HI (Fig. 5 in main text) .....                                                                                | 13   |
| AdH+ClI(1.5) and TS(36.5) (Fig. 5 in main text) .....                                                                                         | 15   |
| AdH+ICl(0.4), TS(35.3), Intermediate and AdI+HCl (Fig. 5 in main text) .....                                                                  | 16   |
| AdH+ClI+ICl(-1.6), TS(8.0), Intermediate(-13.0) and AdCl+I <sub>2</sub> +HCl(-25.2) (Fig. 6 in main text) .....                               | 19   |
| AdH+ClI+ClI(3.7), TS(22.4), Intermediate(11.1) and AdCl+HI+ClI(-6.3) (Fig. 6 in main text) .....                                              | 21   |
| AdH+ICl+ICl(3.4), TS(17.7), Intermediate(9.3) and AdI+HCl+ICl(-12.8) (Fig. 6 in main text) .....                                              | 23   |
| AdH+ICl+ClI(4.3), TS(33.6), Intermediate(12.8) and AdI+HCl+ClI(-6.2) (Fig. 6 in main text) .....                                              | 26   |
| AdH+3ICl, TS(a-d) (Fig. 7 in main text) .....                                                                                                 | 28   |
| AdH+3ICl, TS(e-h) (Fig. 7 in main text) .....                                                                                                 | 31   |
| AdBr-ICl, TS(17.7), Intermediate(2.2), TS(3.8), Intermediate(2.1), TS(15.8), AdCl-BrI (Fig. 10 in main text) .....                            | 33   |

# <sup>1</sup>H NMR spectra of the reaction mixtures for the halogenation reactions

The integrals on the spectra show the signals from which the kinetic data were taken

## AdH + Br<sub>2</sub>

600 MHz, 22 mg AdH + 0.3 ml Br<sub>2</sub> + 0.1 ml CCl<sub>4</sub> + 0.1 ml CD<sub>2</sub>Cl<sub>2</sub> after 7.7 h at 0 °C

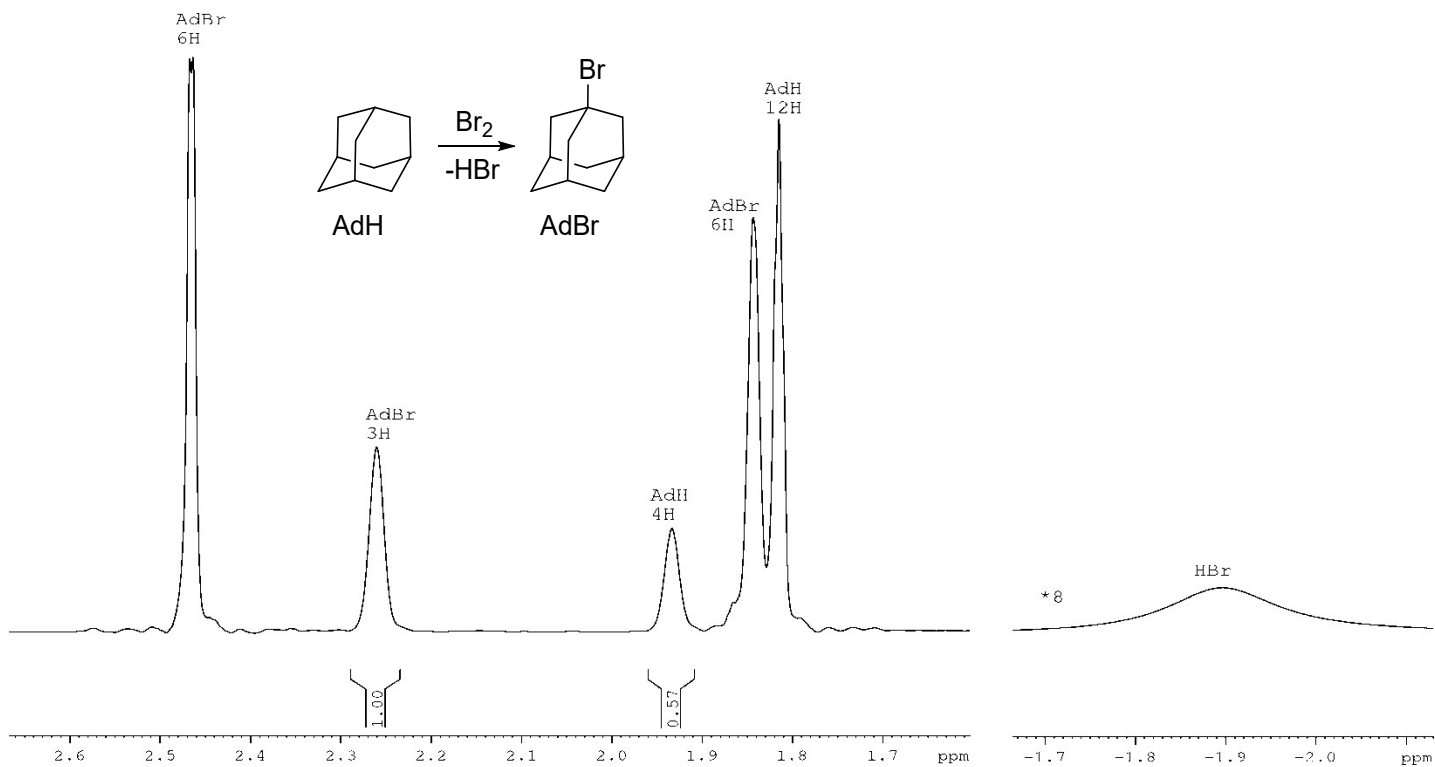

## AdH + ICl

500 MHz, 5.2 mg AdH, 0.03 ml (97 mg) ICl, 0.37 ml CCl<sub>4</sub>, 0.1 ml CD<sub>2</sub>Cl<sub>2</sub> after 18 min at 20 °C

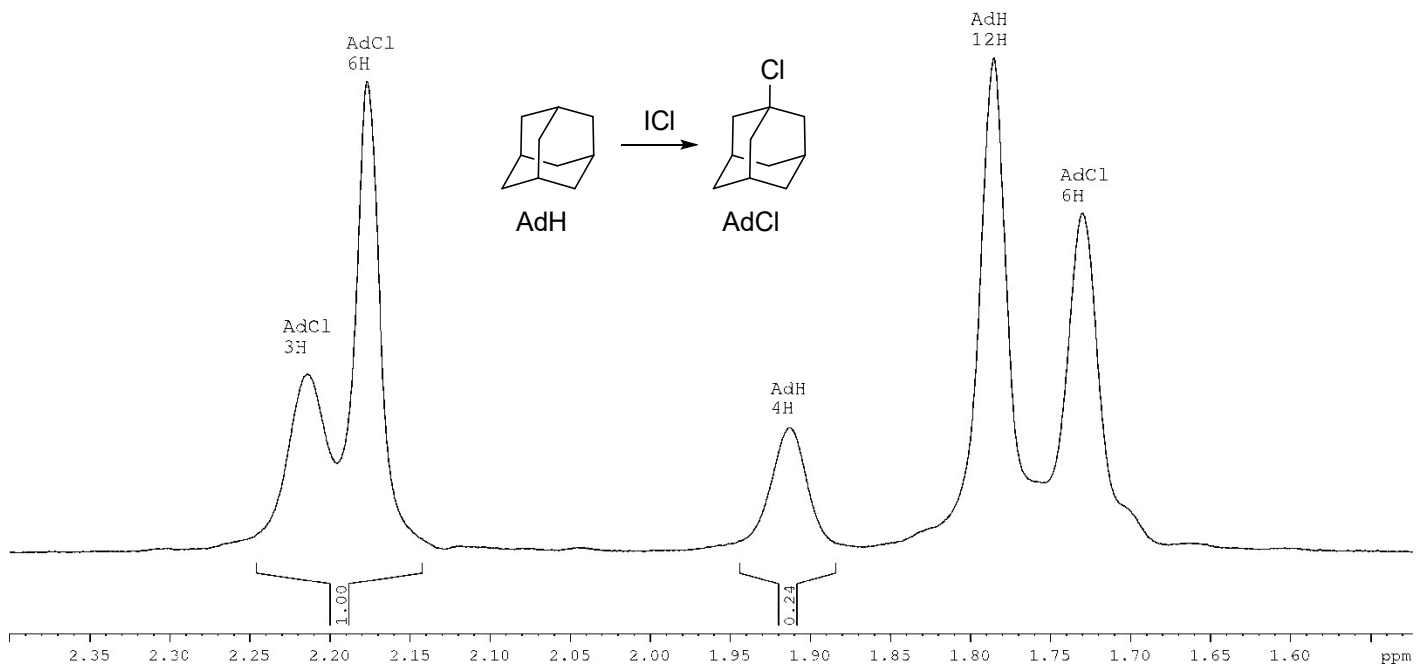

### AdCl + ICl

500 MHz, 14 mg AdH, 0.2 ml (627 mg) ICl, 0.2 ml CCl<sub>4</sub>, 0.1 ml CD<sub>2</sub>Cl<sub>2</sub> after 1.8 h at 20 °C

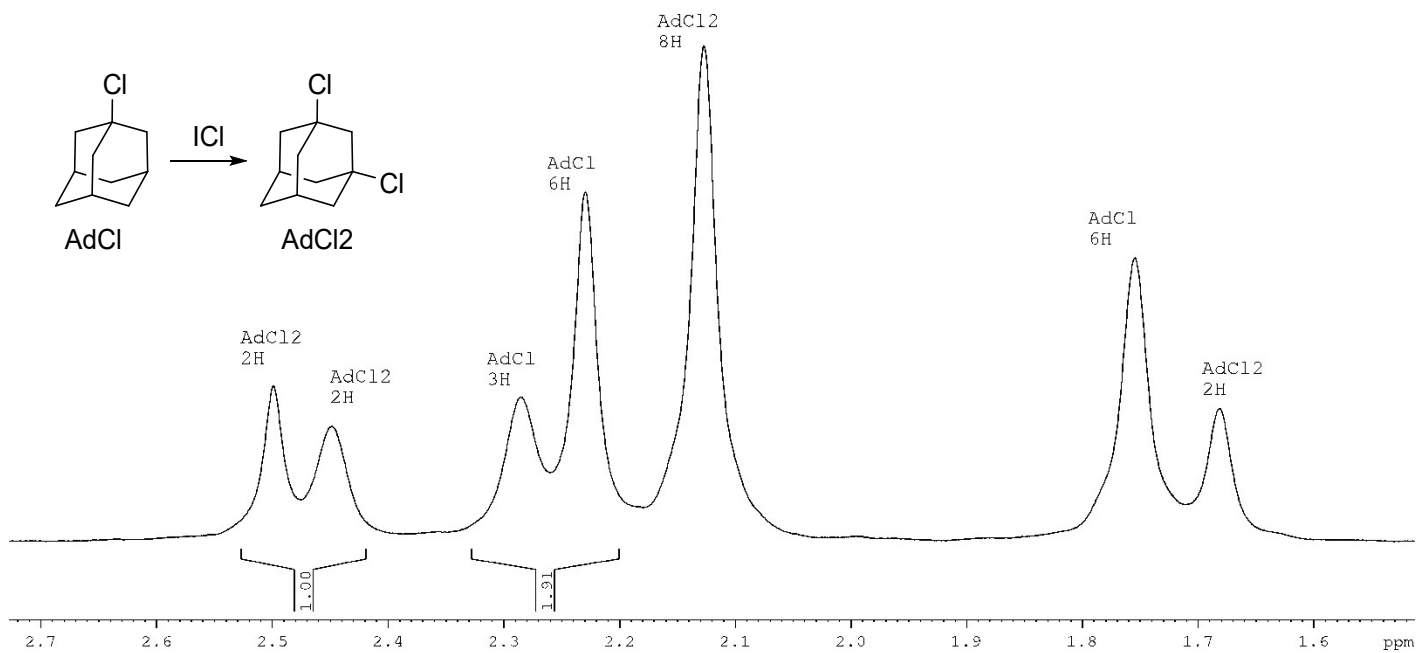

### AdBr + ICl

500 MHz, 15.6 mg AdBr, 0.003 ml (11.9 mg) ICl, 0.4 ml CCl<sub>4</sub>, 0.1 ml CD<sub>2</sub>Cl<sub>2</sub> after 1 min at 20 °C

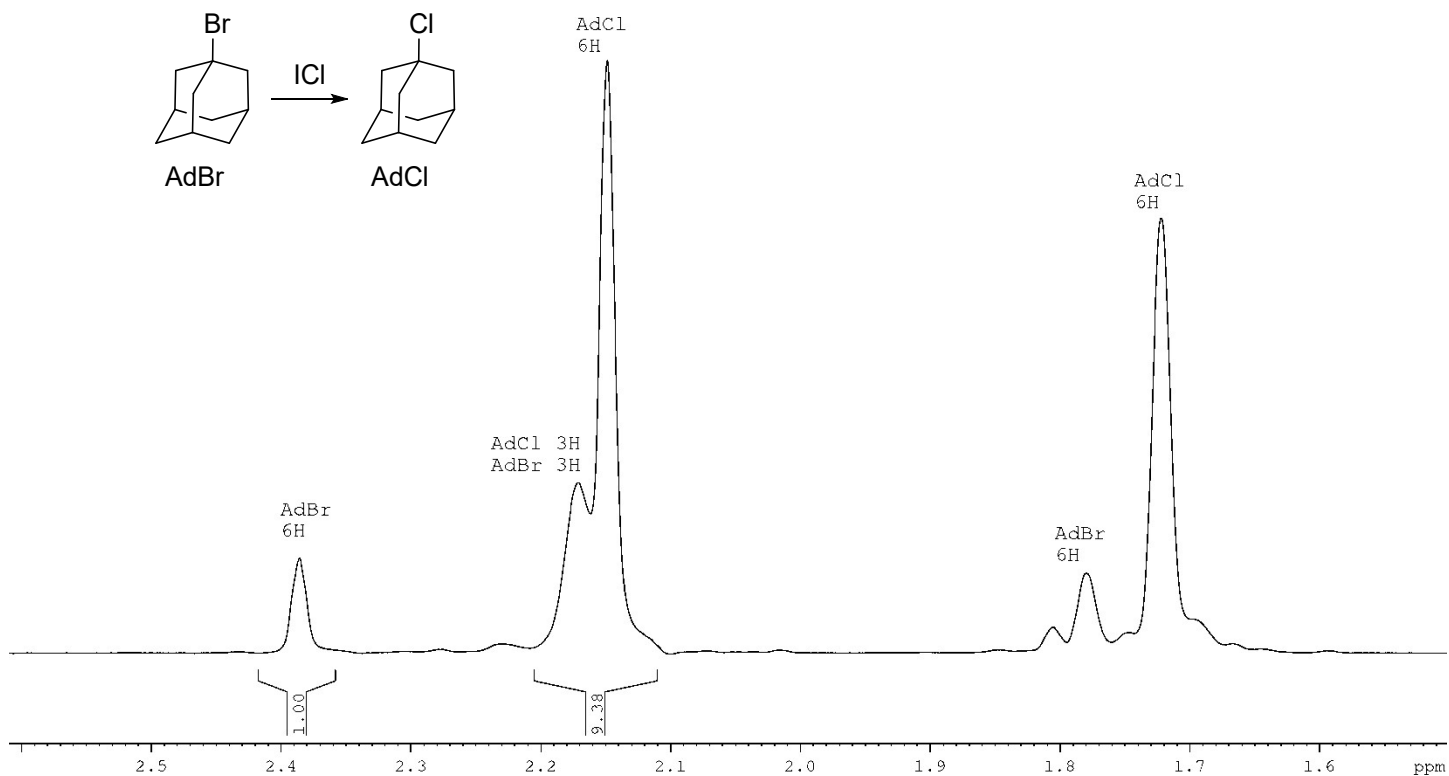

### AdCl + Br<sub>2</sub>

500 MHz, 0.6 ml AdCl, 0.4 ml Br<sub>2</sub>, 0.1 ml CD<sub>2</sub>Cl<sub>2</sub> after 27 h at 20 °C (equilibrium mixture)

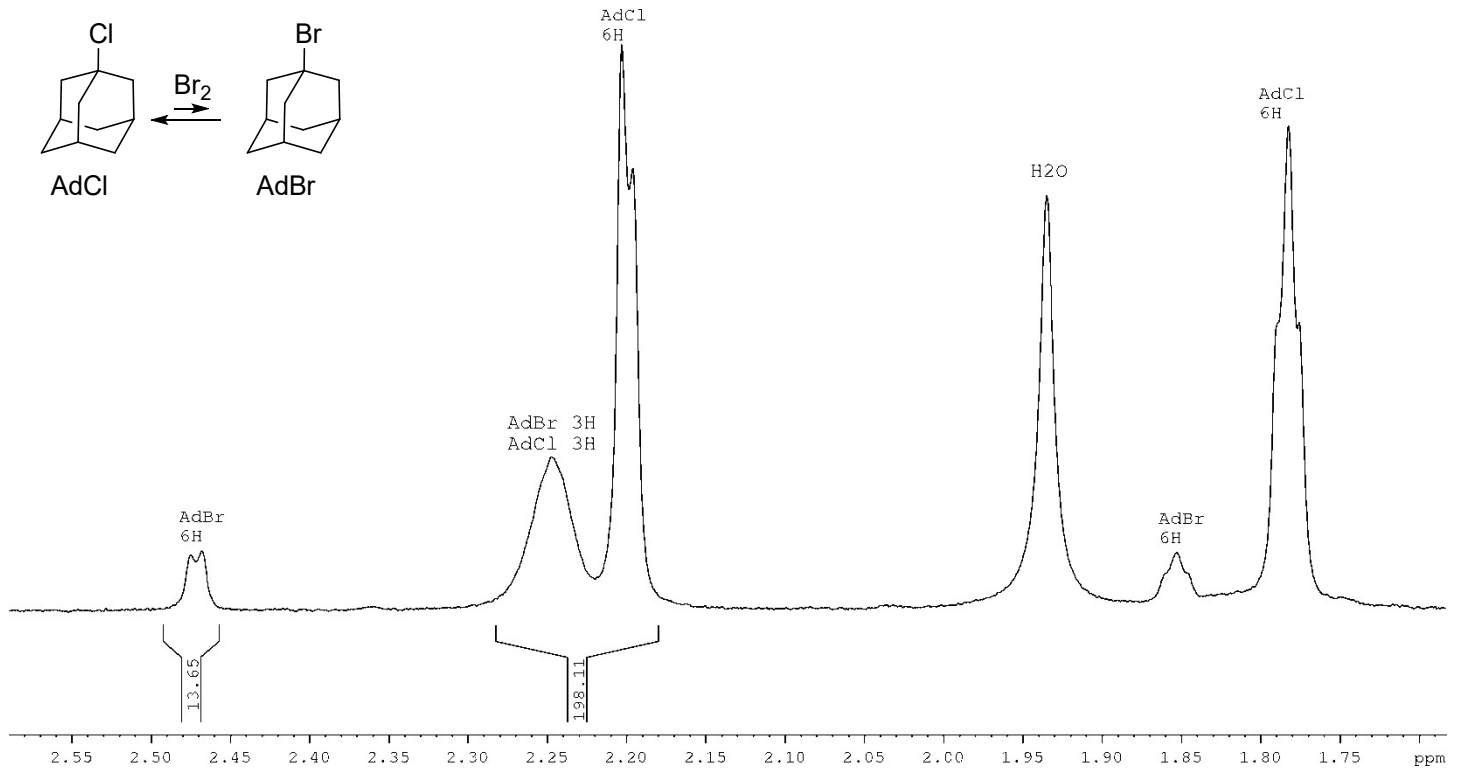

### AdOH + Br<sub>2</sub>

400 MHz, 13 mg AdOH, 0.4 ml Br<sub>2</sub>, 0.1 ml CD<sub>2</sub>Cl<sub>2</sub> after 39 h at 20 °C

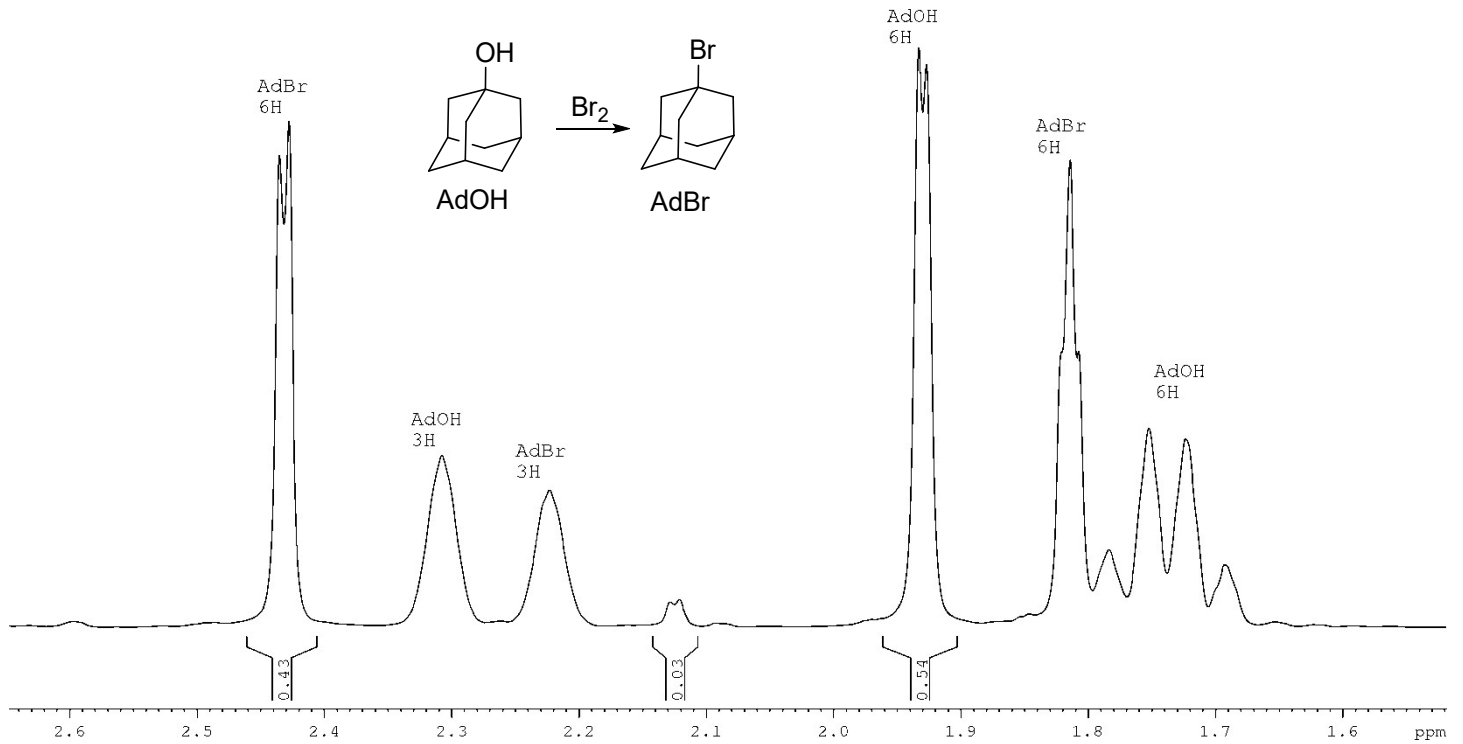

# AdOH + ICl

400 MHz, 13 mg AdOH, 0.05 ml (164 mg) ICl, 0.35 ml CCl<sub>4</sub>, 0.1 ml CD<sub>2</sub>Cl<sub>2</sub> after 16 h at 20 °C

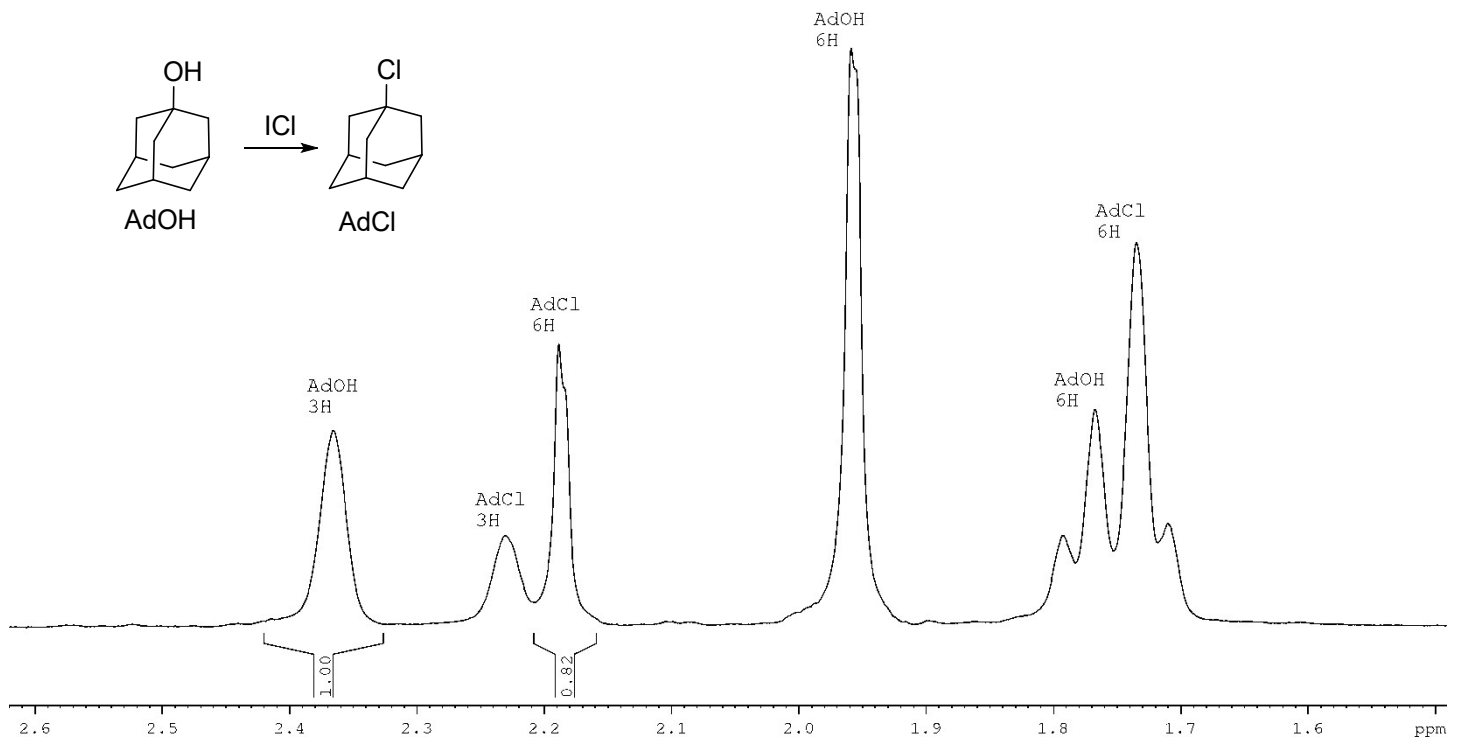

## Quantum chemical calculations

See also <http://limor1.nioch.nsc.ru/quant/bromination/adamantane/>

Structures are in XMol xyz format. Energies are in a.u., Gibbs energy G in kcal/mol

### AdH-Br<sub>2</sub>, TS1 and AdBr-HBr (Fig. 2 in main text)

28

Energy -5537.69018717

|    |             |             |             |
|----|-------------|-------------|-------------|
| C  | 0.72565552  | 0.48665630  | 0.00000000  |
| C  | 2.17801163  | 0.00000000  | 0.00000000  |
| C  | 0.00055953  | -0.00084795 | 1.25784452  |
| C  | -0.00055953 | 0.00084795  | -1.25784452 |
| C  | 2.17932680  | -1.54327685 | -0.00182885 |
| C  | -0.00054746 | -1.54466201 | 1.25614447  |
| C  | 0.00104477  | -1.54231859 | -1.25980252 |
| C  | 1.45172791  | -2.05216174 | 1.25456181  |
| C  | -0.72509222 | -2.05045590 | -0.00289300 |
| C  | 1.45230510  | -2.05073303 | -1.25864747 |
| Br | 0.74957964  | 3.74251949  | -0.01173605 |
| H  | 2.71131903  | 0.38156127  | -0.88561371 |
| H  | 2.70456469  | 0.37841807  | 0.89136948  |
| H  | 0.50786119  | 0.37525762  | 2.16041634  |
| H  | -1.03367967 | 0.37940120  | 1.27494007  |
| H  | -1.03690412 | 0.37570773  | -1.26979277 |
| H  | 0.50189742  | 0.38282485  | -2.16125788 |
| H  | 3.22118187  | -1.90324613 | -0.00101807 |
| H  | -0.52264996 | -1.90569766 | 2.15700354  |
| H  | -0.51890096 | -1.90268555 | -2.16231071 |
| H  | 1.97362121  | -1.70173671 | 2.16015329  |
| H  | 1.46604867  | -3.15473300 | 1.27830308  |
| H  | -1.77097896 | -1.69922653 | -0.00411379 |
| H  | -0.75333572 | -3.15314669 | -0.00534490 |
| H  | 1.97552515  | -1.70483552 | -2.16565126 |
| H  | 1.46413731  | -3.15336570 | -1.27760543 |
| H  | 0.72546231  | 1.61347278  | 0.00080849  |
| Br | 0.78102192  | 6.10625128  | -0.02826064 |

28

Energy -5537.64439305

|    |             |             |             |
|----|-------------|-------------|-------------|
| C  | 0.71951876  | 0.31737856  | 0.00000000  |
| C  | 2.16498270  | 0.00000000  | 0.00000000  |
| C  | 0.00088173  | -0.00056475 | 1.25270817  |
| C  | -0.00088173 | 0.00056475  | -1.25270817 |
| C  | 2.17478184  | -1.58153807 | -0.00242683 |
| C  | 0.00376675  | -1.58689516 | 1.25368933  |
| C  | 0.00262525  | -1.58511345 | -1.25680510 |
| C  | 1.45648845  | -2.07819652 | 1.25784644  |
| C  | -0.72846125 | -2.07741261 | -0.00195756 |
| C  | 1.45578348  | -2.07569031 | -1.26369766 |
| Br | 1.10735923  | 3.10135020  | -0.02761113 |
| H  | 2.67716513  | 0.37176755  | -0.89614070 |
| H  | 2.67559689  | 0.36986174  | 0.89758689  |
| H  | 0.52296378  | 0.36859330  | 2.14474403  |
| H  | -1.03785766 | 0.35417340  | 1.25377692  |
| H  | -1.03978344 | 0.35644537  | -1.25261142 |
| H  | 0.52170943  | 0.37049528  | -2.14430978 |

|    |             |             |             |
|----|-------------|-------------|-------------|
| H  | 3.22937345  | -1.89555503 | -0.00343223 |
| H  | -0.52204976 | -1.90592408 | 2.16638376  |
| H  | -0.52466965 | -1.90270486 | -2.16902254 |
| H  | 1.97843985  | -1.72535210 | 2.16066377  |
| H  | 1.47299952  | -3.17917133 | 1.28541537  |
| H  | -1.77091796 | -1.72276707 | -0.00033115 |
| H  | -0.76354033 | -3.17822484 | -0.00228631 |
| H  | 1.97529569  | -1.72036403 | -2.16771707 |
| H  | 1.47342085  | -3.17656830 | -1.29302677 |
| H  | -0.15615500 | 2.32903110  | 0.01264694  |
| Br | 3.13827591  | 5.20877503  | -0.10357255 |

28

Energy -5537.72002120

|    |             |             |             |
|----|-------------|-------------|-------------|
| C  | 0.72529407  | 0.46611167  | 0.00000000  |
| C  | 2.17684596  | 0.00000000  | 0.00000000  |
| C  | 0.00116793  | -0.00141345 | 1.25683519  |
| C  | -0.00116793 | 0.00141345  | -1.25683519 |
| C  | 2.17621882  | -1.54734877 | -0.00238719 |
| C  | 0.00197690  | -1.54851670 | 1.25365756  |
| C  | 0.00075211  | -1.54572684 | -1.25705359 |
| C  | 1.45265748  | -2.05730363 | 1.25410510  |
| C  | -0.72590589 | -2.05498874 | -0.00202530 |
| C  | 1.45177354  | -2.05340717 | -1.26052554 |
| Br | 0.74021258  | 2.50678261  | 0.00304603  |
| H  | 2.69908827  | 0.38414123  | -0.88912721 |
| H  | 2.69702671  | 0.38054193  | 0.89224768  |
| H  | 0.51313812  | 0.38006340  | 2.15330558  |
| H  | -1.03188155 | 0.37653847  | 1.26669451  |
| H  | -1.03527245 | 0.37781374  | -1.26300363 |
| H  | 0.50572393  | 0.38388193  | -2.15512633 |
| H  | 3.22113416  | -1.89606360 | -0.00305166 |
| H  | -0.52005076 | -1.89747509 | 2.15848258  |
| H  | -0.52197967 | -1.89423620 | -2.16187162 |
| H  | 1.97501267  | -1.70834734 | 2.15972966  |
| H  | 1.46446754  | -3.15914509 | 1.27207159  |
| H  | -1.77125832 | -1.70513114 | -0.00211699 |
| H  | -0.74982791 | -3.15643373 | -0.00191993 |
| H  | 1.97489597  | -1.70271813 | -2.16533456 |
| H  | 1.46523075  | -3.15527666 | -1.28155143 |
| H  | -1.54293929 | 2.64842439  | -0.01749992 |
| Br | -3.01132045 | 2.57274188  | -0.03922299 |

AdH-2Br<sub>2</sub>, TS<sub>2</sub>, Ad<sup>+</sup>Br<sub>3</sub><sup>-</sup>-HBr, TS<sub>2</sub>' and AdBr-HBr-Br<sub>2</sub> (Fig. 2 in main text)

30

Energy -10685.23705937

|   |             |             |             |
|---|-------------|-------------|-------------|
| C | 0.72657916  | 0.47391242  | 0.00000000  |
| C | 2.17905421  | 0.00000000  | 0.00000000  |
| C | 0.00010643  | -0.00147029 | 1.25841963  |
| C | -0.00010643 | 0.00147029  | -1.25841963 |
| C | 2.17772101  | -1.54633055 | -0.00286979 |
| C | -0.00082370 | -1.54860907 | 1.25275254  |
| C | 0.00067367  | -1.54461494 | -1.26131620 |
| C | 1.45044442  | -2.05512095 | 1.25250491  |
| C | -0.72602453 | -2.05246702 | -0.00530522 |

|    |             |             |             |
|----|-------------|-------------|-------------|
| C  | 1.45272532  | -2.04904286 | -1.26150636 |
| Br | 0.83553551  | 3.60911471  | -0.18852154 |
| H  | 2.70836764  | 0.37672181  | -0.88952549 |
| H  | 2.70731334  | 0.37576648  | 0.89034956  |
| H  | 0.50956867  | 0.37211746  | 2.16069644  |
| H  | -1.03367608 | 0.37775765  | 1.27472933  |
| H  | -1.03455393 | 0.37884784  | -1.26899453 |
| H  | 0.50501276  | 0.38167293  | -2.16034340 |
| H  | 3.22058565  | -1.90222082 | -0.00242664 |
| H  | -0.52332904 | -1.90453908 | 2.15525113  |
| H  | -0.51982517 | -1.89871205 | -2.16559896 |
| H  | 1.97213128  | -1.70744267 | 2.15967351  |
| H  | 1.46164947  | -3.15770741 | 1.27271345  |
| H  | -1.77187152 | -1.70382585 | -0.00576554 |
| H  | -0.75298122 | -3.15521087 | -0.00523503 |
| H  | 1.97537323  | -1.69580977 | -2.16571923 |
| H  | 1.46751751  | -3.15155530 | -1.28738153 |
| H  | 0.72271909  | 1.61662860  | 0.00283971  |
| Br | 0.98389521  | 5.99419695  | -0.43453218 |
| Br | -0.97090305 | 7.11864804  | 1.37935082  |
| Br | -2.54186067 | 8.16667257  | 2.83387419  |

30

Energy -10685.22454042

|    |             |             |             |
|----|-------------|-------------|-------------|
| C  | 0.72783664  | 0.30465846  | 0.00000000  |
| C  | 2.17517898  | 0.00000000  | 0.00000000  |
| C  | -0.00060699 | 0.00762283  | 1.24794722  |
| C  | 0.00060699  | -0.00762283 | -1.24794722 |
| C  | 2.16648925  | -1.59536648 | 0.01126496  |
| C  | -0.00986540 | -1.58480936 | 1.25452230  |
| C  | -0.00017870 | -1.59702542 | -1.24889189 |
| C  | 1.44221340  | -2.07080562 | 1.27389348  |
| C  | -0.73933931 | -2.07631997 | 0.00261993  |
| C  | 1.45157446  | -2.08416367 | -1.25094930 |
| Br | -0.08692107 | 3.16542960  | 0.01695841  |
| H  | 2.68874301  | 0.34765560  | -0.90492749 |
| H  | 2.69017335  | 0.36061524  | 0.89881173  |
| H  | 0.52234418  | 0.36624709  | 2.14343548  |
| H  | -1.03607779 | 0.37473552  | 1.23724585  |
| H  | -1.03448879 | 0.35416251  | -1.22805380 |
| H  | 0.51602292  | 0.35691310  | -2.14551591 |
| H  | 3.22280427  | -1.90373794 | 0.01623015  |
| H  | -0.54735493 | -1.88087637 | 2.16735326  |
| H  | -0.52517446 | -1.90689467 | -2.16488254 |
| H  | 1.95967143  | -1.70531812 | 2.17469675  |
| H  | 1.46315783  | -3.17157520 | 1.31500016  |
| H  | -1.77829009 | -1.71505668 | 0.00380492  |
| H  | -0.77807199 | -3.17768047 | 0.00900219  |
| H  | 1.97878708  | -1.73186406 | -2.15163328 |
| H  | 1.46914387  | -3.18538859 | -1.27887152 |
| H  | 0.84737888  | 1.96116318  | -0.00706681 |
| Br | -2.63227977 | 4.71168424  | 0.27677855  |
| Br | -3.46912158 | 2.23014420  | 0.69516579  |
| Br | -4.11321121 | -0.19063959 | 1.08158517  |

30



Energy -10685.24327496

|    |             |             |             |
|----|-------------|-------------|-------------|
| C  | 0.71139810  | 0.26014951  | 0.00000000  |
| C  | 2.15428846  | 0.00000000  | 0.00000000  |
| C  | -0.00011169 | -0.00225732 | 1.24959082  |
| C  | 0.00011169  | 0.00225732  | -1.24959082 |
| C  | 2.15543214  | -1.60304579 | -0.00042735 |
| C  | -0.01467308 | -1.60287115 | 1.25096583  |
| C  | -0.01440945 | -1.60241385 | -1.24920577 |
| C  | 1.43629218  | -2.09212025 | 1.26032283  |
| C  | -0.75552703 | -2.07655968 | 0.00070547  |
| C  | 1.43539515  | -2.09140020 | -1.26031354 |
| Br | 0.59581155  | 3.14318452  | 0.06860262  |
| H  | 2.66320453  | 0.35266794  | -0.90510412 |
| H  | 2.66351357  | 0.35530730  | 0.90344866  |
| H  | 0.53999829  | 0.34954975  | 2.13654845  |
| H  | -1.03343620 | 0.36493103  | 1.24800295  |
| H  | -1.03698184 | 0.35732289  | -1.25013144 |
| H  | 0.54453947  | 0.34733510  | -2.13640854 |
| H  | 3.21410261  | -1.90208627 | -0.00042227 |
| H  | -0.54534968 | -1.89698426 | 2.16826292  |
| H  | -0.55410776 | -1.88896497 | -2.16312146 |
| H  | 1.95802575  | -1.74204393 | 2.16412910  |
| H  | 1.45412249  | -3.19324595 | 1.28524254  |
| H  | -1.78905551 | -1.70141402 | -0.01006908 |
| H  | -0.81481839 | -3.17671339 | -0.00074128 |
| H  | 1.95556640  | -1.73937883 | -2.16477318 |
| H  | 1.45319689  | -3.19227361 | -1.28802076 |
| H  | 1.86550630  | 3.25378014  | -0.61100279 |
| Br | -2.47424008 | 2.90513303  | 1.67833821  |
| Br | -3.30945037 | 1.15431005  | -0.06816565 |
| Br | -3.92812371 | -0.64900914 | -1.80988057 |

30

Energy -10685.22474834

|    |             |             |             |
|----|-------------|-------------|-------------|
| C  | 0.71690291  | 0.28672146  | 0.00000000  |
| C  | 2.16284922  | 0.00000000  | 0.00000000  |
| C  | -0.00274516 | -0.01852938 | 1.24726727  |
| C  | 0.00274516  | 0.01852938  | -1.24726727 |
| C  | 2.16564951  | -1.59404503 | -0.02024598 |
| C  | -0.01402410 | -1.61255886 | 1.22371516  |
| C  | 0.00534167  | -1.58169156 | -1.27628169 |
| C  | 1.43961693  | -2.09899345 | 1.23220387  |
| C  | -0.74236190 | -2.07825031 | -0.03664949 |
| C  | 1.45585845  | -2.06779134 | -1.29141441 |
| Br | 0.63676158  | 3.00510834  | 0.04915217  |
| H  | 2.67297830  | 0.37157674  | -0.89728394 |
| H  | 2.67620732  | 0.34103309  | 0.90878051  |
| H  | 0.53029457  | 0.32121151  | 2.14499656  |
| H  | -1.03341228 | 0.35773779  | 1.25358732  |
| H  | -1.04903828 | 0.32849949  | -1.24037753 |
| H  | 0.50916990  | 0.39174302  | -2.13314056 |
| H  | 3.22328400  | -1.89774048 | -0.01617682 |
| H  | -0.54548910 | -1.93072571 | 2.13265542  |
| H  | -0.53288625 | -1.84995880 | -2.20005767 |
| H  | 1.95227922  | -1.75272537 | 2.13929809  |

|    |             |             |             |
|----|-------------|-------------|-------------|
| H  | 1.46056288  | -3.19822448 | 1.25062367  |
| H  | -1.77687988 | -1.70042868 | -0.05622103 |
| H  | -0.79375056 | -3.17903079 | -0.05028767 |
| H  | 1.97880613  | -1.69607296 | -2.18650983 |
| H  | 1.47840147  | -3.16828620 | -1.33621369 |
| H  | 1.96561521  | 2.94666872  | 0.59103273  |
| Br | -2.40280878 | 4.78517529  | -0.35753391 |
| Br | -2.96987053 | 2.36410184  | -1.01642953 |
| Br | -3.58772113 | -0.08584190 | -1.72256701 |

30

Energy -10685.27227568

|    |             |             |             |
|----|-------------|-------------|-------------|
| C  | 0.72298686  | 0.45974946  | 0.00000000  |
| C  | 2.17482446  | 0.00000000  | 0.00000000  |
| C  | 0.00102239  | -0.00081783 | 1.25855608  |
| C  | -0.00102239 | 0.00081783  | -1.25855608 |
| C  | 2.17203274  | -1.54834692 | -0.00337063 |
| C  | -0.00083794 | -1.54857888 | 1.25397339  |
| C  | -0.00173746 | -1.54667728 | -1.25634155 |
| C  | 1.44866360  | -2.05749741 | 1.25383528  |
| C  | -0.72903949 | -2.05409882 | -0.00137531 |
| C  | 1.44826649  | -2.05416519 | -1.26141844 |
| Br | 0.75180820  | 2.51497524  | -0.00247106 |
| H  | 2.69856950  | 0.38080955  | -0.88955914 |
| H  | 2.69674410  | 0.37670715  | 0.89243402  |
| H  | 0.51628858  | 0.37608818  | 2.15482538  |
| H  | -1.03305039 | 0.37421927  | 1.27110886  |
| H  | -1.03292215 | 0.38104554  | -1.26812124 |
| H  | 0.51237465  | 0.38088473  | -2.15478876 |
| H  | 3.21740594  | -1.89575462 | -0.00299626 |
| H  | -0.52506961 | -1.89440477 | 2.15856940  |
| H  | -0.52773709 | -1.89111690 | -2.16070841 |
| H  | 1.97337329  | -1.71072904 | 2.15924495  |
| H  | 1.46009714  | -3.15915520 | 1.27303126  |
| H  | -1.77504617 | -1.70723592 | -0.00382962 |
| H  | -0.75162123 | -3.15574670 | -0.00162076 |
| H  | 1.97061615  | -1.70206704 | -2.16607680 |
| H  | 1.46221018  | -3.15573467 | -1.28502205 |
| H  | -1.10803553 | 2.99247798  | 0.90678626  |
| Br | -2.43048959 | 3.32849405  | 1.53804883  |
| Br | -3.65106496 | 1.15817670  | -0.02502862 |
| Br | -4.49269047 | -0.64830814 | -1.33029887 |

AdH-3Br<sub>2</sub>, TS3, Ad<sup>+</sup>Br<sub>5</sub><sup>-</sup>-HBr, TS3' and AdBr-HBr-2Br<sub>2</sub> (Fig. 2 in main text)

32

Energy -15832.79332964

|   |             |             |             |
|---|-------------|-------------|-------------|
| C | 0.72844883  | 0.45533326  | 0.00000000  |
| C | 2.18329469  | 0.00000000  | 0.00000000  |
| C | 0.00155734  | -0.00042974 | 1.25727072  |
| C | -0.00155734 | 0.00042974  | -1.25727072 |
| C | 2.17835357  | -1.55124456 | -0.00119678 |
| C | 0.00298800  | -1.54909335 | 1.25748677  |
| C | 0.00077148  | -1.55058621 | -1.25697399 |
| C | 1.45341979  | -2.05414908 | 1.25636541  |
| C | -0.72452966 | -2.05186788 | 0.00098342  |

|    |             |             |             |
|----|-------------|-------------|-------------|
| C  | 1.45340512  | -2.05160615 | -1.25980192 |
| Br | 0.32737323  | 3.46741529  | 0.27764616  |
| H  | 2.71269887  | 0.37673980  | -0.88878825 |
| H  | 2.70603169  | 0.37381977  | 0.89427372  |
| H  | 0.50503924  | 0.37949890  | 2.15962801  |
| H  | -1.03387559 | 0.37123852  | 1.26738359  |
| H  | -1.03633813 | 0.37493112  | -1.25905953 |
| H  | 0.50091351  | 0.38094468  | -2.15984839 |
| H  | 3.22282207  | -1.90245792 | -0.00176717 |
| H  | -0.52343793 | -1.89669432 | 2.16040247  |
| H  | -0.52260486 | -1.90078108 | -2.16104844 |
| H  | 1.97949023  | -1.70905678 | 2.16190050  |
| H  | 1.46485421  | -3.15635142 | 1.27540783  |
| H  | -1.76821466 | -1.69859321 | 0.00543807  |
| H  | -0.75498202 | -3.15406169 | 0.00144454  |
| H  | 1.97595507  | -1.69839491 | -2.16394931 |
| H  | 1.46901376  | -3.15367716 | -1.28663800 |
| H  | 0.74425651  | 1.61761168  | -0.00323562 |
| Br | -0.30760589 | 5.78068301  | 0.74965410  |
| Br | -2.56919452 | 5.02396852  | 2.21651024  |
| Br | -4.47539084 | 4.17173927  | 3.43637024  |
| Br | -4.01893506 | 1.35588427  | 2.98628602  |
| Br | -3.64466673 | -0.98084225 | 2.61727411  |

32

Energy -15832.78838217

|    |             |             |             |
|----|-------------|-------------|-------------|
| C  | 0.72449130  | 0.31319673  | 0.00000000  |
| C  | 2.17420453  | 0.00000000  | 0.00000000  |
| C  | 0.00035078  | 0.00722707  | 1.25072719  |
| C  | -0.00035078 | -0.00722707 | -1.25072719 |
| C  | 2.17165186  | -1.59318473 | 0.00146285  |
| C  | 0.00088338  | -1.58746519 | 1.25146945  |
| C  | 0.00100841  | -1.59559118 | -1.25207144 |
| C  | 1.45203698  | -2.07231334 | 1.26459992  |
| C  | -0.73167844 | -2.07604408 | 0.00139507  |
| C  | 1.45437268  | -2.07746056 | -1.26098105 |
| Br | 0.26466963  | 3.27553433  | -0.31396903 |
| H  | 2.68847939  | 0.35695279  | -0.90146865 |
| H  | 2.68875244  | 0.35805114  | 0.90108653  |
| H  | 0.51989666  | 0.36697079  | 2.14739754  |
| H  | -1.03981455 | 0.35602663  | 1.24559091  |
| H  | -1.03669232 | 0.35427152  | -1.24325644 |
| H  | 0.52025619  | 0.35578170  | -2.14581531 |
| H  | 3.22893314  | -1.89907611 | 0.00165322  |
| H  | -0.53814686 | -1.88290011 | 2.16373236  |
| H  | -0.52862089 | -1.90410279 | -2.16549611 |
| H  | 1.97496008  | -1.71460469 | 2.16495769  |
| H  | 1.46841997  | -3.17388270 | 1.30100425  |
| H  | -1.77184319 | -1.71935977 | 0.00470053  |
| H  | -0.77256982 | -3.17764194 | 0.00785376  |
| H  | 1.97567100  | -1.71633210 | -2.16098092 |
| H  | 1.47786360  | -3.17807579 | -1.29716592 |
| H  | 0.79417002  | 1.87107935  | 0.01811943  |
| Br | -1.38886202 | 5.55715510  | -1.22402492 |
| Br | -3.03582952 | 3.67205385  | -1.71848321 |

|    |             |             |             |
|----|-------------|-------------|-------------|
| Br | -4.56789305 | 1.61922459  | -2.12249122 |
| Br | -4.05048984 | 0.27122745  | 0.19673107  |
| Br | -3.60757071 | -0.94173473 | 2.30665679  |

32

Energy -15832.81459997

|    |             |             |             |
|----|-------------|-------------|-------------|
| C  | 0.72597165  | 0.40074723  | 0.00000000  |
| C  | 2.17722860  | 0.00000000  | 0.00000000  |
| C  | -0.00385716 | 0.00118942  | 1.25643008  |
| C  | 0.00385716  | -0.00118942 | -1.25643008 |
| C  | 2.17379424  | -1.56041484 | 0.00493590  |
| C  | 0.00018653  | -1.55881930 | 1.25806437  |
| C  | 0.00328450  | -1.56179316 | -1.24831279 |
| C  | 1.45177561  | -2.05847905 | 1.26541065  |
| C  | -0.72996638 | -2.06004447 | 0.00379523  |
| C  | 1.45246162  | -2.06663795 | -1.25234936 |
| Br | 0.72395496  | 2.60701228  | 0.06875397  |
| H  | 2.69088347  | 0.37500527  | -0.89667369 |
| H  | 2.69731635  | 0.37564349  | 0.89230843  |
| H  | 0.50919711  | 0.37586304  | 2.15342990  |
| H  | -1.03838631 | 0.37232933  | 1.25426306  |
| H  | -1.02832389 | 0.37276334  | -1.26444666 |
| H  | 0.52600716  | 0.36010055  | -2.15353010 |
| H  | 3.22301416  | -1.89395445 | 0.00636534  |
| H  | -0.52686622 | -1.89071841 | 2.16566651  |
| H  | -0.52199033 | -1.89153347 | -2.15733778 |
| H  | 1.97270469  | -1.70358912 | 2.16885899  |
| H  | 1.46785746  | -3.15969425 | 1.29283958  |
| H  | -1.77029239 | -1.69917306 | 0.00154846  |
| H  | -0.76243740 | -3.16143224 | 0.00366871  |
| H  | 1.97602658  | -1.72188926 | -2.15859794 |
| H  | 1.46143560  | -3.16830818 | -1.26869432 |
| H  | 0.49817829  | 2.88046467  | -1.50400712 |
| Br | 2.41482329  | 1.98559419  | -3.72933619 |
| Br | 0.24915935  | 3.19077652  | -3.28909728 |
| Br | -2.00985856 | 4.39638211  | -2.60239597 |
| Br | -3.12437236 | 2.31775579  | -1.14781055 |
| Br | -4.02891982 | 0.45101953  | 0.14826185  |

32

Energy -15832.81327462

|    |             |             |             |
|----|-------------|-------------|-------------|
| C  | 0.71938569  | 0.27817672  | 0.00000000  |
| C  | 2.16237763  | 0.00000000  | 0.00000000  |
| C  | -0.00458223 | 0.00320892  | 1.24852906  |
| C  | 0.00458223  | -0.00320892 | -1.24852906 |
| C  | 2.16382158  | -1.59663377 | -0.00025515 |
| C  | -0.00946231 | -1.59459229 | 1.25036633  |
| C  | -0.00306304 | -1.59946725 | -1.25157816 |
| C  | 1.44249270  | -2.08368138 | 1.26095755  |
| C  | -0.74486044 | -2.07866328 | -0.00223413 |
| C  | 1.44782562  | -2.08692264 | -1.26224818 |
| Br | 0.72070527  | 3.02578767  | 0.01173045  |
| H  | 2.66502111  | 0.36361641  | -0.90521437 |
| H  | 2.67314415  | 0.35714220  | 0.90203876  |
| H  | 0.52452541  | 0.35676645  | 2.14169804  |
| H  | -1.04167096 | 0.36208668  | 1.23412865  |

|    |             |             |             |
|----|-------------|-------------|-------------|
| H  | -1.03006256 | 0.35794164  | -1.24761376 |
| H  | 0.53689629  | 0.34891183  | -2.14075553 |
| H  | 3.22122588  | -1.90027447 | 0.00195277  |
| H  | -0.54052453 | -1.89596055 | 2.16525000  |
| H  | -0.53292478 | -1.89341760 | -2.16927787 |
| H  | 1.96185235  | -1.72669080 | 2.16326314  |
| H  | 1.45984380  | -3.18459025 | 1.29258616  |
| H  | -1.77947005 | -1.70369861 | -0.00644585 |
| H  | -0.79464303 | -3.17914017 | 0.00142961  |
| H  | 1.96698377  | -1.72813677 | -2.16396613 |
| H  | 1.46732876  | -3.18815731 | -1.29163084 |
| H  | 1.04495107  | 2.98498873  | -1.41195445 |
| Br | 2.60560839  | 2.13741054  | -3.36561596 |
| Br | 0.18404284  | 2.77831658  | -3.79779524 |
| Br | -2.36654371 | 3.38082208  | -4.04880325 |
| Br | -3.16593784 | 2.01421473  | -1.84600301 |
| Br | -3.79505616 | 0.71188116  | 0.17247856  |

32

Energy -15832.82417009

|    |             |             |             |
|----|-------------|-------------|-------------|
| C  | 0.72631754  | 0.45402104  | 0.00000000  |
| C  | 2.17766567  | 0.00000000  | 0.00000000  |
| C  | -0.00152322 | 0.00169184  | 1.25697876  |
| C  | 0.00152322  | -0.00169184 | -1.25697876 |
| C  | 2.17325801  | -1.54954112 | 0.00124228  |
| C  | -0.00044923 | -1.54766380 | 1.25689824  |
| C  | -0.00009860 | -1.55010873 | -1.25219349 |
| C  | 1.45003294  | -2.05403590 | 1.26026385  |
| C  | -0.72904416 | -2.05481377 | 0.00209925  |
| C  | 1.44874500  | -2.05914317 | -1.25479252 |
| Br | 0.71788921  | 2.52004637  | 0.03788926  |
| H  | 2.69848735  | 0.37656195  | -0.89353207 |
| H  | 2.70185367  | 0.38083759  | 0.88900300  |
| H  | 0.50896088  | 0.38026736  | 2.15488541  |
| H  | -1.03488458 | 0.37877798  | 1.26062431  |
| H  | -1.02821809 | 0.38046037  | -1.27218301 |
| H  | 0.51224323  | 0.36938071  | -2.15818306 |
| H  | 3.21855431  | -1.89621487 | 0.00168023  |
| H  | -0.52589380 | -1.89130524 | 2.16178421  |
| H  | -0.52480624 | -1.89256374 | -2.15788798 |
| H  | 1.97345994  | -1.70230363 | 2.16415173  |
| H  | 1.46398262  | -3.15561946 | 1.28359865  |
| H  | -1.77266770 | -1.70230709 | 0.00287242  |
| H  | -0.75592824 | -3.15647996 | 0.00295193  |
| H  | 1.97177336  | -1.71335253 | -2.16181201 |
| H  | 1.46053460  | -3.16103668 | -1.27124628 |
| H  | 1.40338597  | 2.82830164  | -1.81003977 |
| Br | 1.81407771  | 3.04867206  | -3.27875549 |
| Br | -0.92549141 | 2.70364292  | -3.85453095 |
| Br | -3.29467540 | 2.33615401  | -4.16390361 |
| Br | -3.81224161 | 1.23188833  | -1.54494787 |
| Br | -4.14152928 | 0.32786782  | 0.64686101  |

AdH+ClI(2.8), TS(34.4) and AdCl+HI (Fig. 5 in main text)

Energy -1148.071991265083 G(298.15) 120.62

|    |             |             |             |
|----|-------------|-------------|-------------|
| C  | -0.37609900 | 0.99780600  | 0.22929700  |
| C  | -1.54561900 | 0.11394400  | -0.23825700 |
| C  | 0.67705300  | 1.10279300  | -0.88762700 |
| C  | 0.26193700  | 0.39316700  | 1.49218700  |
| C  | -1.01468200 | -1.29809300 | -0.56669400 |
| C  | 1.21008400  | -0.30833200 | -1.21666200 |
| C  | 0.79454400  | -1.01861800 | 1.16543900  |
| C  | 0.04219100  | -1.19884800 | -1.68415900 |
| C  | 1.84898600  | -0.91982000 | 0.04565600  |
| C  | -0.37277000 | -1.90820900 | 0.69475700  |
| Cl | -1.56243400 | 4.14289500  | 0.98433100  |
| H  | -2.31610600 | 0.05465600  | 0.55149400  |
| H  | -2.02255900 | 0.55645000  | -1.13134400 |
| H  | 0.22999200  | 1.55855900  | -1.78946200 |
| H  | 1.50806700  | 1.75600100  | -0.56573300 |
| H  | 1.08737700  | 1.03686600  | 1.84598100  |
| H  | -0.48428100 | 0.33768500  | 2.30518300  |
| H  | -1.85257700 | -1.93561900 | -0.90296900 |
| H  | 1.96700500  | -0.23633400 | -2.01885100 |
| H  | 1.25360900  | -1.45583600 | 2.07082700  |
| H  | -0.41286100 | -0.77667200 | -2.59879100 |
| H  | 0.41578300  | -2.20712000 | -1.94086900 |
| H  | 2.69831800  | -0.29621500 | 0.37974000  |
| H  | 2.25130000  | -1.92367300 | -0.18347100 |
| H  | -1.12741900 | -1.99802800 | 1.49743200  |
| H  | -0.00590100 | -2.92782500 | 0.47604300  |
| H  | -0.76047600 | 2.01760400  | 0.46615600  |
| I  | -2.39246300 | 6.34081700  | 1.52036800  |

28

Energy -1148.018751532390 G(298.15) 118.87

|    |             |             |             |
|----|-------------|-------------|-------------|
| C  | -0.32414800 | 0.90419600  | 0.27681500  |
| C  | -1.55186200 | 0.17958400  | -0.17208900 |
| C  | 0.66359700  | 1.16972200  | -0.81304300 |
| C  | 0.29000200  | 0.33704000  | 1.52324200  |
| C  | -1.04412900 | -1.24494200 | -0.59702900 |
| C  | 1.18087400  | -0.25054300 | -1.24063600 |
| C  | 0.80657500  | -1.08906000 | 1.10548000  |
| C  | -0.01484300 | -1.08698800 | -1.73063300 |
| C  | 1.83760400  | -0.92908500 | -0.02536800 |
| C  | -0.39010400 | -1.92495200 | 0.61891700  |
| Cl | -1.27371300 | 3.31140600  | 0.70561200  |
| H  | -2.29545900 | 0.08219900  | 0.63603200  |
| H  | -2.02847400 | 0.67636200  | -1.03217900 |
| H  | 0.19583200  | 1.67028300  | -1.67576200 |
| H  | 1.51074000  | 1.78358100  | -0.46520500 |
| H  | 1.14405300  | 0.93803400  | 1.88093600  |
| H  | -0.44402300 | 0.22797600  | 2.34048200  |
| H  | -1.91167200 | -1.83359200 | -0.94497400 |
| H  | 1.91832400  | -0.12178500 | -2.05290000 |
| H  | 1.27290500  | -1.56066500 | 1.98902600  |
| H  | -0.48373700 | -0.60464600 | -2.60657100 |
| H  | 0.33502100  | -2.08233900 | -2.05842000 |
| H  | 2.69963600  | -0.33374800 | 0.32498800  |

|   |             |             |             |
|---|-------------|-------------|-------------|
| H | 2.22733100  | -1.92121500 | -0.31555000 |
| H | -1.12802700 | -2.04530000 | 1.43210100  |
| H | -0.04713900 | -2.93784900 | 0.34174200  |
| H | -0.69503200 | 2.59290100  | 1.63268000  |
| I | -2.45013300 | 6.09342500  | 0.92230600  |

28

Energy -1148.092042723480 G(298.15) 121.02

|    |             |             |             |
|----|-------------|-------------|-------------|
| C  | 0.06865900  | 0.99016600  | 0.71914500  |
| C  | -1.37012000 | 0.56971000  | 0.41594000  |
| C  | 0.87718000  | 1.13083200  | -0.57131100 |
| C  | 0.73463500  | -0.00887700 | 1.66712900  |
| C  | -1.33171100 | -0.81000100 | -0.28359600 |
| C  | 0.91344200  | -0.24933600 | -1.27008100 |
| C  | 0.77196900  | -1.38857400 | 0.96783900  |
| C  | -0.52516200 | -0.69690800 | -1.59113400 |
| C  | 1.58116100  | -1.27797100 | -0.33821600 |
| C  | -0.66616300 | -1.83918000 | 0.64926100  |
| Cl | 0.03284100  | 2.65333600  | 1.58287500  |
| H  | -1.94815600 | 0.51234200  | 1.35363900  |
| H  | -1.85275200 | 1.31698400  | -0.23620600 |
| H  | 0.41015100  | 1.88219800  | -1.23005700 |
| H  | 1.89928900  | 1.47261000  | -0.33637100 |
| H  | 1.75618200  | 0.32948000  | 1.90938200  |
| H  | 0.16352600  | -0.06829800 | 2.60895500  |
| H  | -2.36784800 | -1.12021500 | -0.50738300 |
| H  | 1.49467800  | -0.15560300 | -2.20457600 |
| H  | 1.25197100  | -2.11558600 | 1.64700300  |
| H  | -1.00532700 | 0.02896700  | -2.27138900 |
| H  | -0.50950200 | -1.67219000 | -2.10982700 |
| H  | 2.61974700  | -0.97251100 | -0.11701000 |
| H  | 1.62875200  | -2.26304400 | -0.83599000 |
| H  | -1.24881300 | -1.93866100 | 1.58281500  |
| H  | -0.65091800 | -2.83228600 | 0.16563100  |
| H  | -0.98925200 | 3.87542900  | -0.04951700 |
| I  | -1.73845900 | 4.64718700  | -1.31694800 |

### AdH+Cl(1.5) and TS(36.5) (Fig. 5 in main text)

28

Energy -1148.072127879994 G(298.15) 119.46

|    |             |             |             |
|----|-------------|-------------|-------------|
| C  | -1.13105700 | 0.46151300  | -0.79854400 |
| C  | -1.13947300 | -0.96891700 | -1.37329800 |
| C  | 0.22980200  | 1.12391200  | -1.09261200 |
| C  | -1.35143300 | 0.40230800  | 0.72628800  |
| C  | -0.01305200 | -1.79609400 | -0.72221400 |
| C  | 1.35865200  | 0.30000300  | -0.44145900 |
| C  | -0.22560600 | -0.42294300 | 1.38094800  |
| C  | 1.34599100  | -1.13031800 | -1.01682300 |
| C  | 1.13420300  | 0.23953300  | 1.08266800  |
| C  | -0.23546300 | -1.85199100 | 0.80240500  |
| Cl | -0.88010900 | 4.75303100  | 1.12572000  |
| H  | -2.11782200 | -1.44735100 | -1.18278700 |
| H  | -0.99925300 | -0.93692600 | -2.46950900 |
| H  | 0.39090100  | 1.18729600  | -2.18458800 |
| H  | 0.23861700  | 2.15670700  | -0.69898600 |

|   |             |             |             |
|---|-------------|-------------|-------------|
| H | -1.36430600 | 1.42521900  | 1.14482600  |
| H | -2.33284400 | -0.05577200 | 0.94851400  |
| H | -0.02026400 | -2.82146500 | -1.13521600 |
| H | 2.33372200  | 0.77576600  | -0.65351100 |
| H | -0.38515000 | -0.46493200 | 2.47403900  |
| H | 1.52341600  | -1.10049600 | -2.10766900 |
| H | 2.16311000  | -1.72544600 | -0.56894900 |
| H | 1.15936400  | 1.25934400  | 1.50913800  |
| H | 1.94787000  | -0.33607500 | 1.56167700  |
| H | -1.20029800 | -2.34350900 | 1.02560300  |
| H | 0.55773900  | -2.45801300 | 1.27782800  |
| H | -1.93909100 | 1.05336000  | -1.26622200 |
| I | 0.95183600  | 4.72225800  | 2.65273400  |

28

Energy -1148.015082852297 G(298.15) 118.61

|    |             |             |             |
|----|-------------|-------------|-------------|
| C  | -0.68591200 | 0.84378500  | -0.26741700 |
| C  | -1.32413900 | -0.11260200 | -1.21565400 |
| C  | 0.70840700  | 1.24445200  | -0.62182300 |
| C  | -0.88221900 | 0.52195000  | 1.17763500  |
| C  | -0.49177400 | -1.44425200 | -1.01471500 |
| C  | 1.54255700  | -0.08183600 | -0.42193000 |
| C  | -0.05269000 | -0.80650200 | 1.38244400  |
| C  | 0.97963400  | -1.16214200 | -1.35944700 |
| C  | 1.41823900  | -0.51905900 | 1.04544300  |
| C  | -0.62098200 | -1.88934300 | 0.45110100  |
| Cl | -1.78663500 | 3.57598700  | -0.14364400 |
| H  | -2.38194100 | -0.30428500 | -0.97392200 |
| H  | -1.24098700 | 0.21411500  | -2.26468300 |
| H  | 0.79392000  | 1.57623400  | -1.66913700 |
| H  | 1.08893700  | 2.03510200  | 0.04645400  |
| H  | -0.48830800 | 1.31852000  | 1.83095000  |
| H  | -1.93987400 | 0.33462500  | 1.42368700  |
| H  | -0.91230600 | -2.20782500 | -1.69320500 |
| H  | 2.59388000  | 0.14519600  | -0.67300400 |
| H  | -0.15876000 | -1.10540000 | 2.44035900  |
| H  | 1.07234900  | -0.84222200 | -2.41230200 |
| H  | 1.56784800  | -2.09158800 | -1.25301200 |
| H  | 1.81445100  | 0.26693200  | 1.71140200  |
| H  | 2.02475900  | -1.42687100 | 1.21703700  |
| H  | -1.67790800 | -2.09192300 | 0.69873700  |
| H  | -0.06923800 | -2.83532900 | 0.59902800  |
| H  | -1.39381800 | 2.25300300  | -0.32735700 |
| I  | 0.50251000  | 4.59127800  | 2.28697700  |

**AdH+ICI(0.4), TS(35.3), Intermediate and AdI+HCl (Fig. 5 in main text)**

28

Energy -1148.077233106013 G(298.15) 121.56

|   |             |             |             |
|---|-------------|-------------|-------------|
| C | -0.44291900 | 0.95655600  | 0.22147400  |
| C | -1.55098200 | -0.00559900 | -0.23142900 |
| C | 0.58960500  | 1.14654100  | -0.89941700 |
| C | 0.23917600  | 0.42504700  | 1.49070200  |
| C | -0.91254200 | -1.37614600 | -0.55136900 |
| C | 1.22699600  | -0.22466100 | -1.21901600 |
| C | 0.87668600  | -0.94572200 | 1.16982100  |



|    |             |             |             |
|----|-------------|-------------|-------------|
| C  | 0.12817100  | -1.20424500 | -1.67479900 |
| C  | 1.91607300  | -0.77408100 | 0.04512500  |
| C  | -0.22224600 | -1.92454800 | 0.71258200  |
| I  | -1.87945100 | 4.00216200  | 0.95085300  |
| H  | -2.30956700 | -0.11572200 | 0.56365900  |
| H  | -2.06188400 | 0.39402200  | -1.12531700 |
| H  | 0.10309900  | 1.55918600  | -1.80095900 |
| H  | 1.36819700  | 1.86353200  | -0.58404100 |
| H  | 1.01370600  | 1.13385900  | 1.83339400  |
| H  | -0.49905900 | 0.31978100  | 2.30535900  |
| H  | -1.70283500 | -2.07561200 | -0.87843400 |
| H  | 1.97195400  | -0.09791400 | -2.02511100 |
| H  | 1.37029100  | -1.33631300 | 2.07788700  |
| H  | -0.36144400 | -0.82542700 | -2.59027500 |
| H  | 0.57649800  | -2.18264400 | -1.92575900 |
| H  | 2.71636800  | -0.08492900 | 0.37056100  |
| H  | 2.39314300  | -1.74555000 | -0.17825900 |
| H  | -0.96466000 | -2.06426100 | 1.51925100  |
| H  | 0.21979200  | -2.91501000 | 0.50075900  |
| H  | -0.90923100 | 1.95905700  | 0.45557800  |
| Cl | -2.89293500 | 6.13863800  | 1.46718000  |

28

Energy -1148.018939444842 G(298.15) 119.89

|    |             |             |             |
|----|-------------|-------------|-------------|
| C  | -0.22599000 | 1.00010400  | 0.27083300  |
| C  | -1.50759600 | 0.30587800  | -0.13004800 |
| C  | 0.74632400  | 1.12690500  | -0.87280900 |
| C  | 0.38991300  | 0.40653900  | 1.51134300  |
| C  | -1.11000600 | -1.15640600 | -0.51147300 |
| C  | 1.14562000  | -0.33738100 | -1.25735500 |
| C  | 0.78966400  | -1.05826300 | 1.12960100  |
| C  | -0.11180000 | -1.11487800 | -1.68080100 |
| C  | 1.79498800  | -1.01327100 | -0.03585100 |
| C  | -0.46834600 | -1.83686300 | 0.70954900  |
| I  | -1.25806400 | 3.44736700  | 0.83426400  |
| H  | -2.23180100 | 0.29125300  | 0.69981600  |
| H  | -1.97816800 | 0.80136100  | -0.99398000 |
| H  | 0.28749600  | 1.63283700  | -1.73779800 |
| H  | 1.64914600  | 1.68787400  | -0.58082600 |
| H  | 1.28920000  | 0.96067900  | 1.82640600  |
| H  | -0.32434200 | 0.39677200  | 2.35080900  |
| H  | -2.02771000 | -1.69354500 | -0.81088800 |
| H  | 1.86538500  | -0.28713700 | -2.09385500 |
| H  | 1.25268300  | -1.52801300 | 2.01579200  |
| H  | -0.57661600 | -0.63770100 | -2.56173800 |
| H  | 0.16527700  | -2.14260900 | -1.97659800 |
| H  | 2.70455400  | -0.46381800 | 0.26608100  |
| H  | 2.10840600  | -2.03935200 | -0.29874100 |
| H  | -1.18894300 | -1.87758600 | 1.54557200  |
| H  | -0.19890300 | -2.87922900 | 0.46178800  |
| H  | 0.37598100  | 2.92418600  | 0.96174600  |
| Cl | -3.35635300 | 5.08429800  | 0.95916200  |

28

Energy -1148.047211967483 G(298.15) 122.75

|   |             |            |            |
|---|-------------|------------|------------|
| C | -0.18773500 | 1.08120500 | 0.37861600 |
|---|-------------|------------|------------|

|    |             |             |             |
|----|-------------|-------------|-------------|
| C  | -1.53871400 | 0.44238700  | 0.12455600  |
| C  | 0.65309000  | 1.17419000  | -0.87922600 |
| C  | 0.55559600  | 0.42208200  | 1.52105100  |
| C  | -1.25905500 | -1.01577500 | -0.33836100 |
| C  | 0.92566400  | -0.28626900 | -1.33893500 |
| C  | 0.83276900  | -1.04389500 | 1.05718800  |
| C  | -0.41230500 | -0.99041200 | -1.62235400 |
| C  | 1.68687100  | -1.02565800 | -0.22340600 |
| C  | -0.50299100 | -1.75690400 | 0.77947700  |
| I  | -0.65682900 | 3.32218400  | 0.98795700  |
| H  | -2.14365500 | 0.43022400  | 1.04698900  |
| H  | -2.07969500 | 1.01245800  | -0.65019500 |
| H  | 0.10581400  | 1.74240500  | -1.65090400 |
| H  | 1.60942400  | 1.68347700  | -0.67174700 |
| H  | 1.51016200  | 0.93340100  | 1.73020800  |
| H  | -0.04833200 | 0.41299900  | 2.44386800  |
| H  | -2.22893800 | -1.50687500 | -0.53280100 |
| H  | 1.53745300  | -0.24915800 | -2.25762900 |
| H  | 1.37655300  | -1.55744100 | 1.87012200  |
| H  | -0.95612400 | -0.46032500 | -2.42322700 |
| H  | -0.22874000 | -2.02175500 | -1.97344900 |
| H  | 2.65499700  | -0.52978900 | -0.02976800 |
| H  | 1.90830400  | -2.06149200 | -0.53699100 |
| H  | -1.11671600 | -1.78943400 | 1.69757900  |
| H  | -0.31048100 | -2.80236300 | 0.47900700  |
| H  | 0.15314100  | 2.92458700  | 2.46776200  |
| Cl | -1.83952800 | 3.51594700  | -1.45538700 |

28

Energy -1148.097922995699 G(298.15) 121.74

|   |             |             |             |
|---|-------------|-------------|-------------|
| C | -1.07404400 | 0.52747200  | 0.27570400  |
| C | -1.63012400 | -0.83462900 | -0.13437800 |
| C | -0.36339100 | 1.20564900  | -0.89400800 |
| C | -0.14816000 | 0.40180700  | 1.48406000  |
| C | -0.43135500 | -1.73008400 | -0.54557600 |
| C | 0.83317800  | 0.30611600  | -1.30326900 |
| C | 1.04790400  | -0.49590100 | 1.06930100  |
| C | 0.31109100  | -1.07882900 | -1.72674900 |
| C | 1.79261000  | 0.15939500  | -0.10811900 |
| C | 0.52623900  | -1.88241200 | 0.65038500  |
| I | -2.83928600 | 1.83400600  | 0.87709700  |
| H | -2.17826700 | -1.29514000 | 0.70461300  |
| H | -2.33069900 | -0.72595200 | -0.97925600 |
| H | -1.05501600 | 1.32814300  | -1.74414100 |
| H | -0.00214900 | 2.20476000  | -0.59933600 |
| H | 0.21476000  | 1.39469800  | 1.79713600  |
| H | -0.68591800 | -0.05031000 | 2.33404800  |
| H | -0.82211500 | -2.71930200 | -0.84460000 |
| H | 1.35589100  | 0.78738200  | -2.14916000 |
| H | 1.72561000  | -0.59362200 | 1.93621700  |
| H | -0.36622400 | -0.98115900 | -2.59425200 |
| H | 1.15401900  | -1.72026700 | -2.04096800 |
| H | 2.17911100  | 1.14963000  | 0.19161700  |
| H | 2.66155100  | -0.45935600 | -0.39592300 |
| H | 0.00404000  | -2.36406500 | 1.49665600  |

|    |             |             |            |
|----|-------------|-------------|------------|
| H  | 1.37258500  | -2.53654100 | 0.37376900 |
| H  | -1.15213300 | 3.69397500  | 1.35088700 |
| Cl | -0.09970800 | 4.47453400  | 1.51824600 |

AdH+ClI+ICI(-1.6), TS(8.0), Intermediate(-13.0) and AdCl+I<sub>2</sub>+HCl(-25.2) (Fig. 6 in main text)

30

|        |                    |             |             |
|--------|--------------------|-------------|-------------|
| Energy | -1905.814460746882 | G(298.15)   | 113.65      |
| C      | -1.00322800        | 0.41951000  | -0.17390000 |
| C      | -0.54073300        | 1.88384500  | -0.32742700 |
| C      | -0.57770600        | -0.10304400 | 1.21132400  |
| C      | -0.34564300        | -0.43906500 | -1.27152200 |
| C      | 0.99289500         | 1.95944100  | -0.19421900 |
| C      | 0.95570500         | -0.03387000 | 1.34803700  |
| C      | 1.18841100         | -0.36876100 | -1.13962400 |
| C      | 1.41319900         | 1.43096900  | 1.19120900  |
| C      | 1.60800300         | -0.89382300 | 0.24759100  |
| C      | 1.64576300         | 1.09626200  | -1.29163500 |
| H      | -2.10333800        | 0.37214700  | -0.27065300 |
| H      | -0.85628800        | 2.27606600  | -1.31132000 |
| H      | -1.02024100        | 2.51289900  | 0.44450600  |
| H      | -1.05904500        | 0.49405200  | 2.00722600  |
| H      | -0.91738900        | -1.14952300 | 1.34466500  |
| H      | -0.68189000        | -1.49042200 | -1.18569200 |
| H      | -0.65831600        | -0.08143800 | -2.26947100 |
| H      | 1.32152900         | 3.00912000  | -0.30471300 |
| H      | 1.25729500         | -0.41120600 | 2.34208100  |
| H      | 1.65714100         | -0.98636800 | -1.92720500 |
| H      | 0.96425500         | 2.05400400  | 1.98625200  |
| H      | 2.51078300         | 1.49629100  | 1.30495600  |
| H      | 1.30120600         | -1.95030300 | 0.36101900  |
| H      | 2.70852700         | -0.86267300 | 0.34669600  |
| H      | 1.36475700         | 1.47781600  | -2.29026900 |
| H      | 2.74691600         | 1.15707400  | -1.21628500 |
| Cl     | -5.35628500        | -0.04087100 | -0.56276400 |
| I      | -4.49045300        | -2.28459400 | -0.07218900 |
| I      | -2.18577700        | -4.07875600 | 0.63216600  |
| Cl     | -1.84005300        | -6.46477700 | 1.04116200  |

30

|        |                    |             |             |
|--------|--------------------|-------------|-------------|
| Energy | -1905.799492567934 | G(298.15)   | 113.90      |
| C      | -0.80513600        | 0.62254200  | -0.04136800 |
| C      | -0.27627000        | 1.99777500  | 0.06079600  |
| C      | -0.67039500        | -0.22273900 | 1.14968200  |
| C      | -0.62424100        | -0.05664600 | -1.33834200 |
| C      | 1.29959200         | 1.71924100  | 0.06760000  |
| C      | 0.90701300         | -0.51643900 | 1.15329200  |
| C      | 0.94599100         | -0.33236200 | -1.34873700 |
| C      | 1.63243000         | 0.83136800  | 1.27550500  |
| C      | 1.27972200         | -1.22831000 | -0.15130800 |
| C      | 1.67214100         | 1.01810600  | -1.24747100 |
| H      | -2.73441000        | 0.91087000  | -0.08571100 |
| H      | -0.52388800        | 2.62996800  | -0.80572100 |
| H      | -0.55478200        | 2.50404100  | 0.99760900  |
| H      | -0.93221000        | 0.29751900  | 2.08391300  |
| H      | -1.20809700        | -1.18466000 | 1.07101200  |

|    |             |             |             |
|----|-------------|-------------|-------------|
| H  | -1.16389500 | -1.01611100 | -1.38670700 |
| H  | -0.88554100 | 0.57931200  | -2.19825600 |
| H  | 1.79400000  | 2.70324200  | 0.14786000  |
| H  | 1.09619700  | -1.16866100 | 2.02156600  |
| H  | 1.17706500  | -0.83741600 | -2.30244400 |
| H  | 1.35695000  | 1.34060500  | 2.21551700  |
| H  | 2.72287600  | 0.65888000  | 1.31310900  |
| H  | 0.75314200  | -2.19628100 | -0.20676900 |
| H  | 2.36269700  | -1.44969600 | -0.14729700 |
| H  | 1.42172000  | 1.66100400  | -2.10953800 |
| H  | 2.76366200  | 0.85262900  | -1.27839400 |
| Cl | -3.88742200 | 0.25859500  | -0.18835600 |
| I  | -5.60366300 | -2.68963000 | -0.29538200 |
| I  | -2.87678500 | -3.52917400 | 0.44218700  |
| Cl | -0.43846500 | -4.15757400 | 1.13215400  |

30

Energy -1905.835086344822 G(298.15) 115.18

|    |             |             |             |
|----|-------------|-------------|-------------|
| C  | -0.48293100 | -0.91886300 | 0.00082300  |
| C  | -1.24707300 | 0.13338700  | -0.75452000 |
| C  | -0.00058700 | -0.43883100 | 1.34986400  |
| C  | 0.60407200  | -1.56233200 | -0.82747700 |
| C  | -0.20576300 | 1.26586500  | -1.05161400 |
| C  | 1.03844100  | 0.68745000  | 1.05167600  |
| C  | 1.64236600  | -0.43227500 | -1.11559300 |
| C  | 0.33773100  | 1.81734500  | 0.27753900  |
| C  | 2.19173600  | 0.10545000  | 0.21672900  |
| C  | 0.94638800  | 0.69601500  | -1.89589500 |
| H  | -3.43542800 | 1.97386300  | 3.38505000  |
| H  | -1.65708400 | -0.25561500 | -1.70006700 |
| H  | -2.07929600 | 0.54198800  | -0.16047700 |
| H  | -0.83606500 | -0.03009300 | 1.94096000  |
| H  | 0.47287700  | -1.26155100 | 1.90941300  |
| H  | 1.07761300  | -2.39068000 | -0.27652500 |
| H  | 0.20009400  | -1.94695400 | -1.77819500 |
| H  | -0.73372400 | 2.05993500  | -1.60856900 |
| H  | 1.41895600  | 1.06226000  | 2.01841800  |
| H  | 2.45921300  | -0.86899600 | -1.71697300 |
| H  | -0.48749600 | 2.23700100  | 0.87945000  |
| H  | 1.04975700  | 2.63817100  | 0.07852300  |
| H  | 2.69335400  | -0.70421400 | 0.77503300  |
| H  | 2.94763500  | 0.88725700  | 0.02251200  |
| H  | 0.56196400  | 0.31417200  | -2.85812300 |
| H  | 1.67058700  | 1.49702900  | -2.12857400 |
| Cl | -3.75616400 | 1.16461100  | 2.42739100  |
| I  | -4.40868300 | -1.57445800 | -0.64149800 |
| I  | -2.01462100 | -2.76384900 | 0.53749500  |
| Cl | 0.03213000  | -3.93308800 | 1.64322200  |

30

Energy -1905.855296733595 G(298.15) 115.74

|   |             |             |             |
|---|-------------|-------------|-------------|
| C | -0.06438300 | -1.11471300 | -0.14344900 |
| C | -0.52608800 | -0.13953200 | -1.22237400 |
| C | -0.31815500 | -0.55681300 | 1.25396900  |
| C | 1.40938200  | -1.47730900 | -0.32993900 |
| C | 0.30397900  | 1.15951300  | -1.07057400 |

|    |             |             |             |
|----|-------------|-------------|-------------|
| C  | 0.51307900  | 0.74247400  | 1.40054100  |
| C  | 2.23845700  | -0.17717900 | -0.18004100 |
| C  | 0.06614400  | 1.75536100  | 0.32963600  |
| C  | 2.00742700  | 0.41746500  | 1.22161300  |
| C  | 1.79817500  | 0.83502200  | -1.25377800 |
| H  | -4.08515700 | 0.05018800  | 0.62977900  |
| H  | -0.37477800 | -0.58138000 | -2.22142700 |
| H  | -1.60018700 | 0.08019500  | -1.10320500 |
| H  | -1.38915000 | -0.33539200 | 1.39147200  |
| H  | -0.01681300 | -1.29588500 | 2.01500000  |
| H  | 1.71495800  | -2.21806200 | 0.42780900  |
| H  | 1.56571000  | -1.92158200 | -1.32710900 |
| H  | -0.02439500 | 1.87493900  | -1.84497900 |
| H  | 0.33420500  | 1.15763300  | 2.40789800  |
| H  | 3.30584500  | -0.42821200 | -0.31286500 |
| H  | -1.00239400 | 1.99835900  | 0.46305200  |
| H  | 0.63636400  | 2.69495700  | 0.43951100  |
| H  | 2.33830400  | -0.29667900 | 1.99709600  |
| H  | 2.61014300  | 1.33499400  | 1.34372400  |
| H  | 1.97834200  | 0.42212400  | -2.26269300 |
| H  | 2.39727200  | 1.75884400  | -1.16679600 |
| Cl | -3.98708200 | 1.19340000  | 1.26508400  |
| I  | -6.77010200 | -1.95998000 | -1.10404400 |
| I  | -4.02289400 | -2.24211500 | -0.71520700 |
| Cl | -1.03620600 | -2.73063400 | -0.32770300 |

AdH+Cl+Cl(3.7), TS(22.4), Intermediate(11.1) and AdCl+HI+Cl(-6.3) (Fig. 6 in main text)

30

|        |                    |             |             |
|--------|--------------------|-------------|-------------|
| Energy | -1905.805550373911 | G(298.15)   | 113.38      |
| C      | -1.01975000        | 0.39931100  | -0.19545300 |
| C      | -0.59090200        | 1.83976800  | -0.54720400 |
| C      | -0.56716400        | 0.07016400  | 1.23955300  |
| C      | -0.35937100        | -0.58271800 | -1.18132700 |
| C      | 0.94265800         | 1.96006300  | -0.44800700 |
| C      | 0.96609400         | 0.18605100  | 1.34222000  |
| C      | 1.17426600         | -0.46806000 | -1.08293500 |
| C      | 1.39152400         | 1.62612400  | 0.98796700  |
| C      | 1.62181100         | -0.79875600 | 0.35439800  |
| C      | 1.59939400         | 0.97316400  | -1.43276400 |
| H      | -2.11974200        | 0.31464600  | -0.26701500 |
| H      | -0.92612300        | 2.09363500  | -1.56935700 |
| H      | -1.07313600        | 2.55567500  | 0.14311000  |
| H      | -1.04966400        | 0.75932500  | 1.95647600  |
| H      | -0.88562800        | -0.95466500 | 1.51106500  |
| H      | -0.67430100        | -1.61874400 | -0.95140200 |
| H      | -0.69176600        | -0.36506100 | -2.21276700 |
| H      | 1.24824600         | 2.99231300  | -0.70025900 |
| H      | 1.28846700         | -0.05167200 | 2.37236600  |
| H      | 1.64573600         | -1.17443900 | -1.79031200 |
| H      | 0.93962000         | 2.33942400  | 1.70131400  |
| H      | 2.48895300         | 1.72698600  | 1.07507400  |
| H      | 1.33525800         | -1.83591900 | 0.60953800  |
| H      | 2.72278500         | -0.73575300 | 0.43190100  |
| H      | 1.29777600         | 1.21475900  | -2.46838500 |

|    |             |             |             |
|----|-------------|-------------|-------------|
| H  | 2.70001100  | 1.06396100  | -1.38273800 |
| Cl | -6.00045700 | -1.00065800 | -0.23443900 |
| I  | -4.23772100 | -2.56275700 | 0.33194400  |
| Cl | -1.71931400 | -3.80623200 | 0.87792700  |
| I  | -1.44756100 | -6.15993500 | 1.52950800  |

30

Energy -1905.776250886801 G(298.15) 113.74

|    |             |             |             |
|----|-------------|-------------|-------------|
| C  | -0.80402900 | 0.60817900  | -0.11143200 |
| C  | -0.29174900 | 1.98263100  | 0.06171900  |
| C  | -0.70662500 | -0.28137200 | 1.04938200  |
| C  | -0.57960400 | -0.01353900 | -1.42954200 |
| C  | 1.28581500  | 1.71984200  | 0.10928600  |
| C  | 0.87426100  | -0.55550800 | 1.09358000  |
| C  | 0.99395800  | -0.27521700 | -1.39700900 |
| C  | 1.58724900  | 0.78862300  | 1.29234700  |
| C  | 1.29441000  | -1.21422700 | -0.22408800 |
| C  | 1.70720000  | 1.07399400  | -1.21911600 |
| H  | -2.80827900 | 1.04082600  | -0.20572500 |
| H  | -0.51626300 | 2.64645800  | -0.78715500 |
| H  | -0.60584600 | 2.44782600  | 1.00824300  |
| H  | -1.00396100 | 0.20092400  | 1.99256600  |
| H  | -1.23518900 | -1.24161400 | 0.92241600  |
| H  | -1.10935000 | -0.97136200 | -1.53604900 |
| H  | -0.81623700 | 0.65573100  | -2.27072300 |
| H  | 1.76579000  | 2.70503700  | 0.24283300  |
| H  | 1.03350400  | -1.24402900 | 1.94003800  |
| H  | 1.25996300  | -0.74095500 | -2.36152500 |
| H  | 1.27746700  | 1.25865800  | 2.24186100  |
| H  | 2.67724200  | 0.62214600  | 1.35853100  |
| H  | 0.77389700  | -2.18119200 | -0.33508500 |
| H  | 2.37668400  | -1.43595700 | -0.19430900 |
| H  | 1.48091100  | 1.74853300  | -2.06343600 |
| H  | 2.80016500  | 0.91613400  | -1.21985600 |
| Cl | -3.79080300 | 0.14541200  | -0.20315500 |
| I  | -5.46788700 | -2.61994800 | 0.04464300  |
| Cl | -2.93206500 | -3.43505000 | 0.74007300  |
| I  | -0.52062800 | -4.35098600 | 1.46068900  |

30

Energy -1905.791796009956 G(298.15) 112.13

|   |             |             |             |
|---|-------------|-------------|-------------|
| C | -0.65166400 | 0.83217300  | 0.30361300  |
| C | 0.28456500  | 1.95886900  | 0.41704000  |
| C | -0.50851500 | -0.25913100 | 1.24698900  |
| C | -1.14632400 | 0.51755500  | -1.03314300 |
| C | 1.60224700  | 1.28389500  | -0.20613100 |
| C | 0.81636500  | -0.95456500 | 0.61575500  |
| C | 0.15706800  | -0.17058300 | -1.66988300 |
| C | 1.95916300  | 0.06482800  | 0.65636000  |
| C | 0.49977200  | -1.39199800 | -0.81521100 |
| C | 1.29460000  | 0.86220200  | -1.65095600 |
| H | -3.64711000 | 2.76712200  | 1.81020500  |
| H | 0.00418400  | 2.82688100  | -0.19771200 |
| H | 0.49154000  | 2.26048100  | 1.45438600  |
| H | -0.27227500 | 0.05566600  | 2.27320900  |
| H | -1.31426500 | -1.00844700 | 1.21732200  |

|    |             |             |             |
|----|-------------|-------------|-------------|
| H  | -1.97225000 | -0.22282700 | -1.02818200 |
| H  | -1.39619400 | 1.41232500  | -1.62301900 |
| H  | 2.39502000  | 2.05158100  | -0.17567600 |
| H  | 0.99671400  | -1.83605400 | 1.26648800  |
| H  | -0.11128900 | -0.45717100 | -2.70110100 |
| H  | 2.17256600  | 0.37230800  | 1.69472400  |
| H  | 2.88031100  | -0.40424400 | 0.26817100  |
| H  | -0.32969400 | -2.11792900 | -0.80539100 |
| H  | 1.37776300  | -1.91166100 | -1.23841400 |
| H  | 1.03202600  | 1.74350700  | -2.26186100 |
| H  | 2.19982300  | 0.41934600  | -2.10199700 |
| Cl | -3.67487400 | 1.56478900  | 1.32903000  |
| I  | -3.80863500 | -2.24594500 | -0.31188900 |
| Cl | -1.76036900 | -3.53225700 | 1.01562000  |
| I  | 0.42973300  | -4.48071500 | 2.25165400  |

30

Energy -1905.823994849053 G(298.15) 114.97

|    |             |             |             |
|----|-------------|-------------|-------------|
| C  | -1.09119700 | 0.61876900  | -0.04322500 |
| C  | -0.49284200 | 2.01981000  | -0.16857100 |
| C  | -0.62307600 | -0.06237300 | 1.24056100  |
| C  | -0.75542900 | -0.22904400 | -1.26864200 |
| C  | 1.04696100  | 1.87656200  | -0.23974400 |
| C  | 0.91773100  | -0.20436100 | 1.16591400  |
| C  | 0.78530100  | -0.36959900 | -1.33997800 |
| C  | 1.55607900  | 1.19149500  | 1.04259200  |
| C  | 1.29329000  | -1.05816300 | -0.05964500 |
| C  | 1.42241700  | 1.02657900  | -1.46814300 |
| H  | -0.87660000 | 2.51355000  | -1.07717300 |
| H  | -0.78339500 | 2.63166900  | 0.70192400  |
| H  | -0.91177200 | 0.54503000  | 2.11473900  |
| H  | -1.09059300 | -1.05563000 | 1.34014500  |
| H  | -1.22214300 | -1.22437500 | -1.18250800 |
| H  | -1.14248100 | 0.25606300  | -2.18050600 |
| H  | 1.48905400  | 2.88480300  | -0.32983000 |
| H  | 1.26601900  | -0.70140400 | 2.08837000  |
| H  | 1.03941900  | -0.98232400 | -2.22295500 |
| H  | 1.30521100  | 1.80543100  | 1.92642300  |
| H  | 2.65652500  | 1.10149900  | 1.00857000  |
| H  | 0.85388100  | -2.06665800 | 0.03314300  |
| H  | 2.38992700  | -1.18153700 | -0.10938900 |
| H  | 1.07505000  | 1.52141300  | -2.39312400 |
| H  | 2.52076500  | 0.93369100  | -1.53962200 |
| Cl | -2.96734300 | 0.83114700  | 0.04237100  |
| H  | -3.70648300 | -1.14942500 | -0.08706900 |
| I  | -4.36922800 | -2.69428800 | -0.21984200 |
| Cl | -1.80506100 | -3.92229600 | 1.08983500  |
| I  | 0.22001200  | -4.85603300 | 2.13538100  |

AdH+ICI+ICI(3.4), TS(17.7), Intermediate(9.3) and AdI+HCl+ICI(-12.8) (Fig. 6 in main text)

30

Energy -1905.812569327197 G(298.15) 117.46

|   |             |             |             |
|---|-------------|-------------|-------------|
| C | -0.52177200 | -0.10334300 | -0.04307200 |
| C | -1.01536900 | 1.26230200  | 0.44664200  |
| C | 0.51935000  | -0.68267100 | 0.92055000  |

|    |             |             |             |
|----|-------------|-------------|-------------|
| C  | 0.04921700  | 0.00181200  | -1.46125200 |
| C  | 0.19662300  | 2.22541600  | 0.48434100  |
| C  | 1.72906800  | 0.28309800  | 0.95763600  |
| C  | 1.25981600  | 0.96654900  | -1.42085700 |
| C  | 1.26070100  | 1.66632200  | 1.44762200  |
| C  | 2.32413800  | 0.40775900  | -0.45767600 |
| C  | 0.79144600  | 2.34982900  | -0.93107100 |
| H  | -1.41874700 | -0.81556900 | -0.07149800 |
| H  | -1.79253500 | 1.65650600  | -0.23114600 |
| H  | -1.46068900 | 1.17271300  | 1.45280200  |
| H  | 0.08950900  | -0.79199500 | 1.93146200  |
| H  | 0.84195900  | -1.68293200 | 0.58293400  |
| H  | 0.36676100  | -0.99161500 | -1.82308800 |
| H  | -0.71756300 | 0.38390500  | -2.15757200 |
| H  | -0.14538900 | 3.21520300  | 0.83619700  |
| H  | 2.48834800  | -0.12288900 | 1.64972700  |
| H  | 1.68185400  | 1.05157700  | -2.43822400 |
| H  | 0.84522900  | 1.58728300  | 2.46838800  |
| H  | 2.12098800  | 2.35780200  | 1.49912300  |
| H  | 2.67553800  | -0.57860800 | -0.81038500 |
| H  | 3.20211900  | 1.07835800  | -0.43825800 |
| H  | 0.03758100  | 2.76342200  | -1.62499700 |
| H  | 1.64380900  | 3.05283300  | -0.91990900 |
| I  | -3.10380700 | -2.23302300 | -0.11369300 |
| C1 | -5.03095700 | -3.81973100 | -0.16532700 |
| I  | -4.49233400 | -6.61752600 | 0.11365200  |
| C1 | -4.42489000 | -9.04278400 | 0.31695100  |

30

Energy -1905.786001777623 G(298.15) 115.07

|   |             |             |             |
|---|-------------|-------------|-------------|
| C | -0.84476500 | 0.58267500  | -0.00213200 |
| C | -0.31564000 | 1.97404300  | -0.00237300 |
| C | -0.62903300 | -0.18165500 | 1.24899100  |
| C | -0.62514000 | -0.18388700 | -1.25122200 |
| C | 1.25570000  | 1.74498700  | 0.00025700  |
| C | 0.94136900  | -0.40937600 | 1.25493500  |
| C | 0.94527500  | -0.41151300 | -1.25189400 |
| C | 1.63655500  | 0.96042800  | 1.26485600  |
| C | 1.32402100  | -1.21042300 | 0.00282900  |
| C | 1.64035000  | 0.95835400  | -1.26194500 |
| H | -2.63057500 | 1.27672000  | -0.00591600 |
| H | -0.59836200 | 2.53719300  | -0.90508300 |
| H | -0.60193400 | 2.53861800  | 0.89834100  |
| H | -0.92048500 | 0.38520600  | 2.14650000  |
| H | -1.13733400 | -1.15921600 | 1.23370500  |
| H | -1.13345100 | -1.16143700 | -1.23567600 |
| H | -0.91390600 | 0.38130900  | -2.15064400 |
| H | 1.72360000  | 2.74513900  | 0.00001800  |
| H | 1.17472400  | -0.97898700 | 2.17071200  |
| H | 1.18153800  | -0.98261400 | -2.16598600 |
| H | 1.35837500  | 1.53032900  | 2.16875600  |
| H | 2.73171700  | 0.82160500  | 1.29648800  |
| H | 0.81960600  | -2.19265000 | 0.00292200  |
| H | 2.41249100  | -1.40021300 | 0.00468000  |
| H | 1.36470200  | 1.52679300  | -2.16756800 |



|    |             |             |             |
|----|-------------|-------------|-------------|
| H  | 2.73562300  | 0.81962000  | -1.29025300 |
| I  | -3.85349100 | 0.07674900  | -0.00607100 |
| Cl | -5.40758900 | -2.43458100 | -0.00480300 |
| I  | -2.99438400 | -3.59396900 | 0.00103300  |
| Cl | -0.63955600 | -4.55924500 | 0.00654400  |

30

Energy -1905.803346657334 G(298.15) 117.58

|    |             |             |             |
|----|-------------|-------------|-------------|
| C  | -0.89844400 | 0.16908000  | -0.00132600 |
| C  | -0.66001800 | 1.66236600  | -0.00276500 |
| C  | -0.40978800 | -0.50514700 | 1.25820900  |
| C  | -0.40663700 | -0.50811500 | -1.25802600 |
| C  | 0.89356000  | 1.84073800  | -0.00100100 |
| C  | 1.14390600  | -0.31913000 | 1.25667800  |
| C  | 1.14705300  | -0.32209200 | -1.25301900 |
| C  | 1.47496800  | 1.18239400  | 1.26202400  |
| C  | 1.72788500  | -0.99170400 | 0.00334700  |
| C  | 1.47819800  | 1.17940000  | -1.26096200 |
| H  | -3.41658600 | 1.53942900  | -0.00627000 |
| H  | -1.08443900 | 2.13965700  | -0.90175700 |
| H  | -1.08670700 | 2.14172500  | 0.89404600  |
| H  | -0.83969400 | -0.03628300 | 2.15834200  |
| H  | -0.64502900 | -1.58217100 | 1.25407400  |
| H  | -0.64187100 | -1.58513200 | -1.25187800 |
| H  | -0.83423900 | -0.04139600 | -2.16036800 |
| H  | 1.10574100  | 2.92475200  | -0.00205900 |
| H  | 1.53588200  | -0.80401500 | 2.16771700  |
| H  | 1.54132400  | -0.80903600 | -2.16196300 |
| H  | 1.06420700  | 1.66413500  | 2.16747000  |
| H  | 2.56967300  | 1.32631600  | 1.28613300  |
| H  | 1.48241700  | -2.06694800 | 0.00432800  |
| H  | 2.82826700  | -0.89527200 | 0.00461000  |
| H  | 1.07010300  | 1.65914600  | -2.16865900 |
| H  | 2.57299900  | 1.32309900  | -1.28235000 |
| I  | -3.33396200 | -0.14123000 | -0.00407700 |
| Cl | -5.60308700 | -2.62323500 | -0.00434400 |
| I  | -3.14660900 | -3.45090700 | -0.00009600 |
| Cl | -0.62907600 | -4.07042600 | 0.00394300  |

30

Energy -1905.835871163298 G(298.15) 115.95

|   |             |             |             |
|---|-------------|-------------|-------------|
| C | -1.04489600 | 0.57532100  | -0.08160000 |
| C | -0.53253500 | 2.01206700  | -0.04907000 |
| C | -0.70769400 | -0.16334900 | 1.20783500  |
| C | -0.52736700 | -0.17156400 | -1.30501700 |
| C | 1.01563100  | 1.94987500  | 0.06192000  |
| C | 0.84217300  | -0.22127800 | 1.31557900  |
| C | 1.02160700  | -0.22914100 | -1.19007900 |
| C | 1.40408400  | 1.21070100  | 1.35536000  |
| C | 1.41111700  | -0.97376400 | 0.09969000  |
| C | 1.58391700  | 1.20324200  | -1.15853200 |
| H | -0.82505800 | 2.54943700  | -0.96665900 |
| H | -0.95256600 | 2.55423200  | 0.81459500  |
| H | -1.12937300 | 0.36487900  | 2.07905000  |
| H | -1.11843300 | -1.18613700 | 1.18973900  |
| H | -0.93779200 | -1.19409200 | -1.33935500 |

|    |             |             |             |
|----|-------------|-------------|-------------|
| H  | -0.82037000 | 0.35105900  | -2.23071100 |
| H  | 1.40129500  | 2.98485700  | 0.08647400  |
| H  | 1.10118000  | -0.75692600 | 2.24604800  |
| H  | 1.41074500  | -0.77066000 | -2.07044400 |
| H  | 1.01093900  | 1.75159600  | 2.23503300  |
| H  | 2.50385000  | 1.18124300  | 1.45505400  |
| H  | 1.03026600  | -2.00977800 | 0.07514400  |
| H  | 2.51146400  | -1.03417500 | 0.17850300  |
| H  | 1.31979800  | 1.73831600  | -2.08853100 |
| H  | 2.68665300  | 1.17375200  | -1.10084400 |
| I  | -3.33431000 | 0.71475200  | -0.24691100 |
| H  | -4.07985800 | -1.55549800 | -0.20894200 |
| Cl | -4.59797700 | -2.80329600 | -0.19402500 |
| I  | -1.93658100 | -4.13161100 | -0.11795600 |
| Cl | 0.29009200  | -5.11406000 | -0.05134800 |

AdH+ICl+ClI(4.3), TS(33.6), Intermediate(12.8) and AdI+HCl+ClI(-6.2) (Fig. 6 in main text)

30

Energy -1905.808193903161 G(298.15) 115.64

|    |             |             |             |
|----|-------------|-------------|-------------|
| C  | -0.90283800 | 0.16985600  | -0.00268800 |
| C  | -0.62414700 | 1.67871700  | -0.00069800 |
| C  | -0.32671400 | -0.48604800 | 1.25882800  |
| C  | -0.32210600 | -0.48384000 | -1.26326600 |
| C  | 0.90896600  | 1.88855900  | 0.00222600  |
| C  | 1.20535200  | -0.27401600 | 1.26024600  |
| C  | 1.20990300  | -0.27178700 | -1.25862600 |
| C  | 1.51074800  | 1.23615000  | 1.26164900  |
| C  | 1.81044500  | -0.92411100 | 0.00130200  |
| C  | 1.51512500  | 1.23839900  | -1.25625300 |
| H  | -2.02927400 | 0.01535600  | -0.00511300 |
| H  | -1.06970200 | 2.15351300  | -0.89278200 |
| H  | -1.07306200 | 2.15185800  | 0.89054300  |
| H  | -0.77238000 | -0.03399900 | 2.16265100  |
| H  | -0.56524000 | -1.56333100 | 1.26984900  |
| H  | -0.56062900 | -1.56109100 | -1.27695500 |
| H  | -0.76439800 | -0.03020100 | -2.16794700 |
| H  | 1.12254900  | 2.97266100  | 0.00355100  |
| H  | 1.63155600  | -0.74318100 | 2.16514900  |
| H  | 1.63950900  | -0.73934100 | -2.16276300 |
| H  | 1.09250400  | 1.70718300  | 2.16968600  |
| H  | 2.60345900  | 1.39976700  | 1.28348800  |
| H  | 1.60514700  | -2.00977100 | 0.00006000  |
| H  | 2.90843900  | -0.79847400 | 0.00343700  |
| H  | 1.10009700  | 1.71088300  | -2.16500400 |
| H  | 2.60790300  | 1.40213500  | -1.27393200 |
| I  | -4.26670600 | -0.40927500 | -0.00120600 |
| Cl | -6.66446100 | -0.75588400 | 0.00246300  |
| Cl | -2.90617800 | -3.27879100 | 0.00112200  |
| I  | -1.62386600 | -5.36189400 | -0.00901800 |

30

Energy -1905.760235753715 G(298.15) 114.86

|   |             |             |             |
|---|-------------|-------------|-------------|
| C | -0.84979700 | 0.48210500  | -0.00355200 |
| C | -0.37326500 | 1.90207700  | -0.00082400 |
| C | -0.56355500 | -0.26967400 | 1.25080800  |

|    |             |             |             |
|----|-------------|-------------|-------------|
| C  | -0.55604600 | -0.26744400 | -1.25746900 |
| C  | 1.19947400  | 1.77631300  | 0.00386400  |
| C  | 1.01271200  | -0.39175200 | 1.25653200  |
| C  | 1.02026100  | -0.38953200 | -1.25378500 |
| C  | 1.62920200  | 1.01512600  | 1.26772000  |
| C  | 1.44841800  | -1.16414300 | 0.00199100  |
| C  | 1.63679600  | 1.01737200  | -1.25873700 |
| H  | -2.67140100 | 1.35459200  | -0.01177900 |
| H  | -0.69238500 | 2.45048100  | -0.90094600 |
| H  | -0.69801900 | 2.44879100  | 0.89830500  |
| H  | -0.89508700 | 0.27368800  | 2.14897500  |
| H  | -1.00794400 | -1.27597800 | 1.24130200  |
| H  | -1.00040000 | -1.27379000 | -1.25260100 |
| H  | -0.88198000 | 0.27750600  | -2.15673400 |
| H  | 1.60976400  | 2.80152100  | 0.00598500  |
| H  | 1.28666500  | -0.94745400 | 2.17004400  |
| H  | 1.29990500  | -0.94354700 | -2.16661700 |
| H  | 1.31671000  | 1.56649300  | 2.17202300  |
| H  | 2.73065300  | 0.94024400  | 1.29984200  |
| H  | 0.99878700  | -2.17248900 | -0.00014700 |
| H  | 2.54582200  | -1.29135700 | 0.00515100  |
| H  | 1.32975900  | 1.57036600  | -2.16391800 |
| H  | 2.73840900  | 0.94245500  | -1.28440700 |
| I  | -3.69817000 | -0.01617000 | -0.01027200 |
| Cl | -5.53008200 | -2.15028400 | -0.00840400 |
| Cl | -3.30583400 | -3.52112300 | -0.00001900 |
| I  | -1.07937300 | -4.74439200 | 0.00766900  |

30

Energy -1905.772773876536 G(298.15) 116.96

|   |             |             |             |
|---|-------------|-------------|-------------|
| C | -0.87652600 | 0.14942900  | -0.00142200 |
| C | -0.63476900 | 1.64762800  | -0.00277300 |
| C | -0.36191800 | -0.51563700 | 1.26035200  |
| C | -0.35829300 | -0.51848300 | -1.26020500 |
| C | 0.91378600  | 1.83943400  | -0.00076300 |
| C | 1.18461000  | -0.31876600 | 1.25849800  |
| C | 1.18822600  | -0.32161200 | -1.25434000 |
| C | 1.50433900  | 1.18602900  | 1.26129600  |
| C | 1.77534900  | -0.98482300 | 0.00367900  |
| C | 1.50797000  | 1.18317200  | -1.25963000 |
| H | -3.42035700 | 1.43146100  | -0.00649500 |
| H | -1.06412500 | 2.12278700  | -0.90108000 |
| H | -1.06670100 | 2.12482600  | 0.89321700  |
| H | -0.79754800 | -0.05114100 | 2.16068200  |
| H | -0.59769300 | -1.59338300 | 1.26646800  |
| H | -0.59405900 | -1.59624000 | -1.26458600 |
| H | -0.79132100 | -0.05600400 | -2.16282600 |
| H | 1.12078200  | 2.92451900  | -0.00169300 |
| H | 1.58750900  | -0.79746300 | 2.16829600  |
| H | 1.59373300  | -0.80237800 | -2.16188600 |
| H | 1.09137400  | 1.66364400  | 2.16793000  |
| H | 2.59787400  | 1.33927700  | 1.28301400  |
| H | 1.54386300  | -2.06407600 | 0.00456600  |
| H | 2.87502500  | -0.88063600 | 0.00514200  |
| H | 1.09763400  | 1.65872900  | -2.16853500 |

|    |             |             |             |
|----|-------------|-------------|-------------|
| H  | 2.60156500  | 1.33637300  | -1.27854100 |
| I  | -3.26369000 | -0.22872800 | -0.00442500 |
| Cl | -5.71169300 | -2.15435100 | -0.00587100 |
| Cl | -3.50406400 | -3.28586300 | -0.00142600 |
| I  | -1.14088200 | -4.43772500 | 0.00335800  |

30

Energy -1905.826124312380 G(298.15) 116.39

|    |             |             |             |
|----|-------------|-------------|-------------|
| C  | -0.94023800 | 0.84646600  | -0.00406600 |
| C  | -0.10096800 | 2.12282500  | -0.00449000 |
| C  | -0.69160700 | 0.02328600  | 1.25720600  |
| C  | -0.68520100 | 0.01825700  | -1.26075900 |
| C  | 1.39323400  | 1.70532800  | 0.00010400  |
| C  | 0.80547000  | -0.38897800 | 1.25951800  |
| C  | 0.81185600  | -0.39400900 | -1.25385600 |
| C  | 1.68525100  | 0.87423700  | 1.26280400  |
| C  | 1.10533900  | -1.22936400 | 0.00526600  |
| C  | 1.69164400  | 0.86920300  | -1.25776500 |
| I  | -3.12616900 | 1.49410500  | -0.01093000 |
| H  | -0.32316600 | 2.72948300  | -0.89837500 |
| H  | -0.32768600 | 2.73303000  | 0.88583800  |
| H  | -0.92396700 | 0.61681500  | 2.15699600  |
| H  | -1.32890700 | -0.87625600 | 1.26462900  |
| H  | -1.32252500 | -0.88127100 | -1.26783400 |
| H  | -0.91298400 | 0.60820100  | -2.16407200 |
| H  | 2.01023100  | 2.62184000  | -0.00017100 |
| H  | 0.99786300  | -0.98658700 | 2.16839800  |
| H  | 1.00884400  | -0.99526000 | -2.15934100 |
| H  | 1.48610300  | 1.47589900  | 2.16794400  |
| H  | 2.75252000  | 0.58984300  | 1.28787000  |
| H  | 0.49108000  | -2.14668500 | 0.00552800  |
| H  | 2.16429400  | -1.54477600 | 0.00858400  |
| H  | 1.49708000  | 1.46723100  | -2.16630400 |
| H  | 2.75902700  | 0.58473400  | -1.27630000 |
| H  | -4.18625900 | -0.77532000 | -0.00331800 |
| Cl | -4.80176100 | -1.95245200 | 0.00085400  |
| Cl | -2.40490200 | -3.81260200 | -0.00150700 |
| I  | -0.58349400 | -5.39722500 | -0.00245000 |

### AdH+3ICl, TS(a-d) (Fig. 7 in main text)

32

Energy -2663.551738843684 G(298.15) 111.19

|   |             |             |             |
|---|-------------|-------------|-------------|
| C | -0.66062200 | 0.48944100  | 0.32697500  |
| C | -0.68536600 | 1.93627300  | 0.00827100  |
| C | 0.05443000  | 0.10534200  | 1.55617000  |
| C | -0.52193800 | -0.42379600 | -0.82121700 |
| C | 0.82679000  | 2.19861000  | -0.42331900 |
| C | 1.57908400  | 0.36965500  | 1.12496400  |
| C | 0.99598300  | -0.16905200 | -1.25408000 |
| C | 1.73366400  | 1.85260200  | 0.76619900  |
| C | 1.90053600  | -0.53048700 | -0.07211000 |
| C | 1.14617600  | 1.31075800  | -1.63472200 |
| H | -2.35155500 | 0.25219400  | 0.74417400  |
| H | -1.35219400 | 2.17775900  | -0.83276100 |
| H | -0.92814700 | 2.56602100  | 0.87754600  |

|    |             |             |             |
|----|-------------|-------------|-------------|
| H  | -0.18332600 | 0.74840000  | 2.41705800  |
| H  | -0.03495100 | -0.96125100 | 1.81950300  |
| H  | -0.64075200 | -1.48672000 | -0.55014100 |
| H  | -1.18537600 | -0.16341400 | -1.65940300 |
| H  | 0.90174300  | 3.26880300  | -0.68398300 |
| H  | 2.18945700  | 0.09294100  | 2.00143100  |
| H  | 1.18614200  | -0.82853000 | -2.11815800 |
| H  | 1.49276400  | 2.49189700  | 1.63333300  |
| H  | 2.78593600  | 2.05797100  | 0.50001400  |
| H  | 1.77897900  | -1.58820200 | 0.21608500  |
| H  | 2.95854300  | -0.39255500 | -0.36052600 |
| H  | 0.48515800  | 1.56363400  | -2.48172500 |
| H  | 2.18159900  | 1.50208500  | -1.96849900 |
| C1 | -3.65813300 | -0.04864200 | 0.61892500  |
| I  | -6.34466700 | -1.76187900 | -0.19251700 |
| I  | -4.28668600 | -3.64392100 | -0.85298200 |
| C1 | -2.15659500 | -5.28335400 | -1.36569400 |
| I  | -0.41050000 | -4.33690100 | 0.48198100  |
| C1 | 1.20382400  | -3.36568400 | 2.17920800  |

32

Energy -2663.536707926814 G(298.15) 110.33

|    |             |             |             |
|----|-------------|-------------|-------------|
| C  | -0.59221000 | 0.44306900  | 0.33388400  |
| C  | -0.69753700 | 1.88142700  | 0.01457200  |
| C  | 0.12456800  | 0.09275500  | 1.56555500  |
| C  | -0.43399900 | -0.46754500 | -0.80791900 |
| C  | 0.80513100  | 2.20788000  | -0.42463700 |
| C  | 1.64110400  | 0.42007100  | 1.12718800  |
| C  | 1.07529000  | -0.15340600 | -1.24592000 |
| C  | 1.72945300  | 1.90666300  | 0.76317900  |
| C  | 1.99432100  | -0.47444000 | -0.06417900 |
| C  | 1.15973100  | 1.32988900  | -1.63313000 |
| H  | -2.36535900 | 0.08921400  | 0.83529300  |
| H  | -1.37574900 | 2.08838300  | -0.82608800 |
| H  | -0.96181000 | 2.50331500  | 0.88282600  |
| H  | -0.13498600 | 0.73331200  | 2.42166300  |
| H  | 0.08852400  | -0.97803900 | 1.83099400  |
| H  | -0.51133600 | -1.53417400 | -0.53457000 |
| H  | -1.10803500 | -0.22992800 | -1.64381700 |
| H  | 0.82908200  | 3.27930600  | -0.68916300 |
| H  | 2.25983000  | 0.17175900  | 2.00616200  |
| H  | 1.28742200  | -0.80870200 | -2.10784500 |
| H  | 1.46447800  | 2.53819600  | 1.62884000  |
| H  | 2.77074700  | 2.15658200  | 0.49206500  |
| H  | 1.90785800  | -1.53383600 | 0.23306700  |
| H  | 3.04632600  | -0.30015800 | -0.35461300 |
| H  | 0.48652000  | 1.54996000  | -2.47955100 |
| H  | 2.18494300  | 1.56532900  | -1.96998900 |
| C1 | -3.64172200 | -0.20678400 | 0.60139700  |
| I  | -6.43037800 | -1.77144800 | -0.22466200 |
| C1 | -4.65008700 | -3.54518200 | -0.85933500 |
| I  | -2.58409400 | -5.35007900 | -1.45490200 |
| I  | -0.56366300 | -4.29726600 | 0.47250700  |
| C1 | 1.19563500  | -3.30612200 | 2.11112900  |

32

Energy -2663.532185840383 G(298.15) 110.13

|    |             |             |             |
|----|-------------|-------------|-------------|
| C  | -0.90427200 | 0.70898900  | 0.04862200  |
| C  | -0.52858600 | 2.14237100  | 0.09633200  |
| C  | -0.41350700 | -0.13038400 | 1.15789600  |
| C  | -0.87968600 | 0.07875000  | -1.28943100 |
| C  | 1.03561700  | 2.07849000  | -0.21484600 |
| C  | 1.15462100  | -0.19632500 | 0.84983600  |
| C  | 0.67997900  | 0.01019100  | -1.60419700 |
| C  | 1.70987900  | 1.23333200  | 0.87479300  |
| C  | 1.35123100  | -0.84483100 | -0.52408700 |
| C  | 1.23214400  | 1.44359800  | -1.59914800 |
| H  | -2.56552300 | 0.73316300  | 0.35001100  |
| H  | -1.02610700 | 2.74531700  | -0.67857800 |
| H  | -0.68095300 | 2.59609200  | 1.08742400  |
| H  | -0.56078900 | 0.32729800  | 2.14783700  |
| H  | -0.81516700 | -1.15604300 | 1.14314300  |
| H  | -1.29789900 | -0.94148000 | -1.28256200 |
| H  | -1.37702700 | 0.69105400  | -2.05729100 |
| H  | 1.40414700  | 3.11927000  | -0.20012200 |
| H  | 1.59122400  | -0.81927200 | 1.64973000  |
| H  | 0.78324600  | -0.45329800 | -2.60031000 |
| H  | 1.55951500  | 1.69141500  | 1.86784200  |
| H  | 2.80003600  | 1.20695600  | 0.69791600  |
| H  | 0.94213900  | -1.86853600 | -0.52590800 |
| H  | 2.43241700  | -0.92871900 | -0.73712600 |
| H  | 0.73862200  | 2.05349900  | -2.37598800 |
| H  | 2.30907300  | 1.42453700  | -1.84384800 |
| Cl | -3.81379000 | 0.19411600  | 0.40218600  |
| I  | -5.72934600 | -2.43211200 | 0.16350800  |
| I  | -3.05519600 | -3.51672500 | -0.20270000 |
| Cl | -0.56004700 | -4.35944300 | -0.54073700 |
| Cl | 0.66294300  | -3.74444300 | 1.82042100  |
| I  | 1.82106200  | -3.08682400 | 3.91938300  |

32

Energy -2663.516496895100 G(298.15) 109.52

|   |             |             |             |
|---|-------------|-------------|-------------|
| C | -0.79433500 | 0.59878700  | 0.17188600  |
| C | -0.58681900 | 2.06053000  | 0.06883000  |
| C | -0.20859100 | -0.06761400 | 1.34083300  |
| C | -0.76369700 | -0.15414800 | -1.09620300 |
| C | 0.96520800  | 2.13705700  | -0.30159000 |
| C | 1.35693000  | 0.00762600  | 0.96860800  |
| C | 0.78853400  | -0.08354600 | -1.47141200 |
| C | 1.75743400  | 1.48036100  | 0.83743900  |
| C | 1.57911800  | -0.75141200 | -0.34214300 |
| C | 1.18352900  | 1.39202900  | -1.62631500 |
| H | -2.54694400 | 0.55016200  | 0.57134500  |
| H | -1.17364600 | 2.52373800  | -0.73837800 |
| H | -0.75653000 | 2.59025100  | 1.01822000  |
| H | -0.36613400 | 0.47171800  | 2.28626400  |
| H | -0.48118600 | -1.12953200 | 1.43896500  |
| H | -1.06468600 | -1.20680700 | -0.98269500 |
| H | -1.34900600 | 0.32632600  | -1.89401600 |
| H | 1.21480900  | 3.20781200  | -0.40165100 |
| H | 1.86496000  | -0.50009500 | 1.80959100  |

|    |             |             |             |
|----|-------------|-------------|-------------|
| H  | 0.90457500  | -0.63125500 | -2.42221800 |
| H  | 1.58858100  | 2.01792000  | 1.78657800  |
| H  | 2.83854700  | 1.54798600  | 0.62079100  |
| H  | 1.28248900  | -1.80610100 | -0.21958900 |
| H  | 2.65636500  | -0.74545600 | -0.58833700 |
| H  | 0.60267400  | 1.86778900  | -2.43552900 |
| H  | 2.24762600  | 1.46030100  | -1.91418700 |
| Cl | -3.78065800 | 0.03706600  | 0.45687500  |
| I  | -6.01926100 | -2.22786600 | -0.18679300 |
| Cl | -3.71277000 | -3.43994700 | -0.56240800 |
| I  | -1.23867100 | -4.59453600 | -0.93123800 |
| Cl | 0.26898500  | -3.81966800 | 1.35587300  |
| I  | 1.74257000  | -3.11947600 | 3.38260400  |

### AdH+3ICl, TS(e-h) (Fig. 7 in main text)

32

|    | Energy      | -2663.539690089339 | G(298.15)   | 110.50 |
|----|-------------|--------------------|-------------|--------|
| C  | -0.65571200 | 0.55104200         | 0.33250900  |        |
| C  | -0.62309900 | 1.99673800         | 0.01400700  |        |
| C  | 0.03179200  | 0.13800000         | 1.56508300  |        |
| C  | -0.54856000 | -0.36755700        | -0.81332400 |        |
| C  | 0.90007100  | 2.20000900         | -0.40881700 |        |
| C  | 1.56774800  | 0.34446800         | 1.14303500  |        |
| C  | 0.98074700  | -0.16947900        | -1.23694100 |        |
| C  | 1.78541100  | 1.82018400         | 0.78673600  |        |
| C  | 1.86619000  | -0.56601000        | -0.05205900 |        |
| C  | 1.19355700  | 1.30199500         | -1.61892400 |        |
| H  | -2.50228300 | 0.71291900         | 1.06549900  |        |
| H  | -1.27726600 | 2.26278300         | -0.82920500 |        |
| H  | -0.84177200 | 2.63548200         | 0.88287400  |        |
| H  | -0.18583300 | 0.78900800         | 2.42479000  |        |
| H  | -0.10365100 | -0.92460800        | 1.82316900  |        |
| H  | -0.71007500 | -1.42324700        | -0.54258000 |        |
| H  | -1.19534700 | -0.08223900        | -1.65513100 |        |
| H  | 1.01504600  | 3.26693300         | -0.66753900 |        |
| H  | 2.15844500  | 0.04321300         | 2.02483300  |        |
| H  | 1.14705400  | -0.83705500        | -2.09946300 |        |
| H  | 1.56398200  | 2.46906100         | 1.65195500  |        |
| H  | 2.84646500  | 1.98301600         | 0.52740200  |        |
| H  | 1.70396400  | -1.61867700        | 0.23442300  |        |
| H  | 2.93002500  | -0.46578600        | -0.33321300 |        |
| H  | 0.54888100  | 1.58101900         | -2.47026500 |        |
| H  | 2.23787300  | 1.45226600         | -1.94499200 |        |
| I  | -3.85375700 | -0.15978700        | 0.56271500  |        |
| Cl | -6.07243100 | -2.00601800        | -0.47815500 |        |
| I  | -4.26399800 | -3.73698500        | -1.00819600 |        |
| Cl | -2.22303200 | -5.40333600        | -1.43862600 |        |
| I  | -0.49042900 | -4.39868500        | 0.42035500  |        |
| Cl | 1.06999900  | -3.38866700        | 2.13804500  |        |

32

|   | Energy      | -2663.520210349516 | G(298.15)  | 109.76 |
|---|-------------|--------------------|------------|--------|
| C | -0.89356600 | 0.74774900         | 0.06230000 |        |
| C | -0.47849000 | 2.17373600         | 0.11881800 |        |
| C | -0.41324600 | -0.10803100        | 1.16390500 |        |

|    |             |             |             |
|----|-------------|-------------|-------------|
| C  | -0.87705300 | 0.12966700  | -1.28267800 |
| C  | 1.07928800  | 2.08435200  | -0.19309600 |
| C  | 1.14951500  | -0.19725900 | 0.85284600  |
| C  | 0.67869800  | 0.03916500  | -1.59776800 |
| C  | 1.74041000  | 1.21795400  | 0.88787000  |
| C  | 1.33651000  | -0.83934100 | -0.52675500 |
| C  | 1.26537500  | 1.45850800  | -1.58300700 |
| H  | -2.68099000 | 1.24047300  | 0.46081300  |
| H  | -0.96681700 | 2.79169200  | -0.64993900 |
| H  | -0.62242800 | 2.62169200  | 1.11367200  |
| H  | -0.55574800 | 0.34416400  | 2.15660200  |
| H  | -0.83408400 | -1.12459000 | 1.14180100  |
| H  | -1.30953800 | -0.88279900 | -1.28535300 |
| H  | -1.36815700 | 0.75497400  | -2.04341500 |
| H  | 1.46607800  | 3.11818800  | -0.16940200 |
| H  | 1.57665000  | -0.83512200 | 1.64677100  |
| H  | 0.77147700  | -0.41742400 | -2.59806300 |
| H  | 1.60222200  | 1.67169100  | 1.88471800  |
| H  | 2.82880400  | 1.16842700  | 0.70720600  |
| H  | 0.90926700  | -1.85564700 | -0.53390300 |
| H  | 2.41529200  | -0.94279400 | -0.74057300 |
| H  | 0.78544700  | 2.08525600  | -2.35494300 |
| H  | 2.34164100  | 1.41728700  | -1.82653000 |
| I  | -3.91261300 | 0.05975700  | 0.45311700  |
| Cl | -5.49769400 | -2.48349200 | 0.25542000  |
| I  | -3.19311300 | -3.63959200 | -0.16316300 |
| Cl | -0.84605900 | -4.65941500 | -0.58242200 |
| Cl | 0.58314000  | -3.92073400 | 1.62455200  |
| I  | 1.91978400  | -3.21849000 | 3.60059800  |

32

Energy -2663.517984245028 G(298.15) 110.46

|   |             |             |             |
|---|-------------|-------------|-------------|
| C | -0.61879400 | 0.47006700  | 0.31995000  |
| C | -0.67387400 | 1.91170500  | -0.01088700 |
| C | 0.08646300  | 0.11155200  | 1.56102800  |
| C | -0.43804500 | -0.44727300 | -0.81980800 |
| C | 0.83738400  | 2.20698300  | -0.41992700 |
| C | 1.60805300  | 0.40990100  | 1.15277900  |
| C | 1.07931200  | -0.15854800 | -1.22717800 |
| C | 1.73555900  | 1.89378900  | 0.78556400  |
| C | 1.97586800  | -0.49120300 | -0.03046700 |
| C | 1.20291100  | 1.32072600  | -1.61933700 |
| H | -2.46021100 | 0.53630500  | 1.28177400  |
| H | -1.33558700 | 2.12865100  | -0.86197900 |
| H | -0.94369700 | 2.54073100  | 0.85028100  |
| H | -0.17904600 | 0.75491300  | 2.41315400  |
| H | 0.01379200  | -0.95635500 | 1.82594800  |
| H | -0.54226100 | -1.50821100 | -0.54313600 |
| H | -1.09133800 | -0.20574200 | -1.66977000 |
| H | 0.88750000  | 3.27692700  | -0.68668400 |
| H | 2.20872300  | 0.15632400  | 2.04284100  |
| H | 1.29740300  | -0.81940000 | -2.08341100 |
| H | 1.46560100  | 2.53342100  | 1.64389700  |
| H | 2.78611300  | 2.12234700  | 0.53306600  |
| H | 1.86881900  | -1.54935300 | 0.26380500  |



|    |             |             |             |
|----|-------------|-------------|-------------|
| H  | 3.03466200  | -0.32994300 | -0.30179200 |
| H  | 0.55097700  | 1.55052600  | -2.47982000 |
| H  | 2.23919200  | 1.53576200  | -1.93465700 |
| I  | -3.72375200 | -0.30411500 | 0.55451300  |
| Cl | -6.04574800 | -1.81908100 | -0.58530900 |
| Cl | -4.53484500 | -3.59713400 | -1.03604200 |
| I  | -2.71851600 | -5.50031800 | -1.43997200 |
| I  | -0.65408300 | -4.39518100 | 0.45626000  |
| Cl | 1.08146700  | -3.37877400 | 2.06531400  |

32

Energy -2663.498704847052 G(298.15) 109.57

|    |             |             |             |
|----|-------------|-------------|-------------|
| C  | -0.83782000 | 0.64679100  | 0.07557700  |
| C  | -0.55113700 | 2.10672800  | 0.03003800  |
| C  | -0.31944500 | -0.07226800 | 1.25384400  |
| C  | -0.71546100 | -0.06297000 | -1.21928200 |
| C  | 1.01338900  | 2.14976400  | -0.23153900 |
| C  | 1.25599700  | -0.02690100 | 0.99122700  |
| C  | 0.85244900  | -0.02226600 | -1.48323000 |
| C  | 1.71376100  | 1.43518300  | 0.93316000  |
| C  | 1.55254000  | -0.74915000 | -0.32838200 |
| C  | 1.30586400  | 1.44264400  | -1.56309400 |
| H  | -2.73207900 | 1.22286300  | 0.52973000  |
| H  | -1.07293400 | 2.61429000  | -0.79543400 |
| H  | -0.77088900 | 2.61267700  | 0.98244700  |
| H  | -0.53831400 | 0.43764000  | 2.20343100  |
| H  | -0.63618300 | -1.12415400 | 1.30068800  |
| H  | -1.04879900 | -1.10872700 | -1.16100300 |
| H  | -1.23784200 | 0.45404400  | -2.03766700 |
| H  | 1.30136800  | 3.21455900  | -0.27841000 |
| H  | 1.70978400  | -0.57137200 | 1.83877600  |
| H  | 1.02270900  | -0.54132400 | -2.44219000 |
| H  | 1.49825900  | 1.94907100  | 1.88620800  |
| H  | 2.80792900  | 1.47408300  | 0.78843200  |
| H  | 1.22399400  | -1.79998600 | -0.26381500 |
| H  | 2.64320900  | -0.76280400 | -0.50198300 |
| H  | 0.79670300  | 1.96188900  | -2.39380000 |
| H  | 2.38906500  | 1.48460200  | -1.77363100 |
| I  | -3.81479000 | -0.07136500 | 0.36630600  |
| Cl | -5.73275400 | -2.25977500 | 0.08056100  |
| Cl | -3.74485300 | -3.62387800 | -0.33825900 |
| I  | -1.56989700 | -4.98069900 | -0.77539300 |
| Cl | 0.26789300  | -4.05748900 | 1.26643000  |
| I  | 1.96828100  | -3.37170200 | 3.06025800  |

AdBr-ICI, TS(17.7), Intermediate(2.2), TS(3.8), Intermediate(2.1), TS(15.8), AdCl-BrI (Fig. 10 in main text)

28

Energy -3721.09282239

|   |             |             |             |
|---|-------------|-------------|-------------|
| C | -0.91609400 | 0.57368600  | 0.84454400  |
| C | -1.24430500 | 0.56870000  | -0.63954200 |
| C | 0.58486300  | 0.58808800  | 1.08642900  |
| C | -1.58517000 | -0.58704200 | 1.56716300  |
| C | -0.66313100 | -0.73663900 | -1.23531500 |
| C | 1.16088500  | -0.71853900 | 0.48805500  |

|    |             |             |             |
|----|-------------|-------------|-------------|
| C  | -1.00685900 | -1.89308500 | 0.96689500  |
| C  | 0.85821800  | -0.76388700 | -1.01753900 |
| C  | 0.51353200  | -1.92389600 | 1.18850800  |
| C  | -1.31430100 | -1.94158400 | -0.53773500 |
| I  | -0.28912500 | 4.37771300  | 0.15066700  |
| H  | -2.33391500 | 0.60421900  | -0.79022600 |
| H  | -0.80107800 | 1.44615200  | -1.13379400 |
| H  | 1.04365200  | 1.46284800  | 0.60146300  |
| H  | 0.79796700  | 0.64152100  | 2.16459000  |
| H  | -1.37675000 | -0.54076000 | 2.64718000  |
| H  | -2.67633400 | -0.55370700 | 1.42397800  |
| H  | -0.89053500 | -0.75490700 | -2.31262700 |
| H  | 2.24945400  | -0.72367200 | 0.65471900  |
| H  | -1.48122800 | -2.74537600 | 1.47831300  |
| H  | 1.32895500  | 0.09328000  | -1.52554600 |
| H  | 1.28475100  | -1.67861300 | -1.45987300 |
| H  | 0.74005000  | -1.90058100 | 2.26705200  |
| H  | 0.93182700  | -2.86070600 | 0.78673400  |
| H  | -2.40429300 | -1.93012600 | -0.70245400 |
| H  | -0.92781300 | -2.87932300 | -0.96813300 |
| Cl | 0.87979000  | 6.10274700  | -1.10932200 |
| Br | -1.70608700 | 2.29404700  | 1.66384400  |

28

Energy -3721.06109751

|    |             |             |             |
|----|-------------|-------------|-------------|
| C  | 0.13607000  | -1.53744500 | 0.05188100  |
| C  | -0.67096800 | -1.61195300 | -1.16231700 |
| C  | 1.56706000  | -1.29080900 | -0.11432200 |
| C  | -0.26535800 | -2.38194100 | 1.17589500  |
| C  | -0.20868100 | -3.04917200 | -1.71229200 |
| C  | 2.03970000  | -2.72720900 | -0.65965200 |
| C  | 0.20024100  | -3.81891800 | 0.63561300  |
| C  | 1.29894500  | -3.00478200 | -1.96961700 |
| C  | 1.71072700  | -3.78281000 | 0.39690500  |
| C  | -0.55913000 | -4.10573600 | -0.66224500 |
| I  | 0.04459000  | 1.93789500  | -0.06655400 |
| H  | -1.74889900 | -1.63018100 | -0.96836400 |
| H  | -0.41209600 | -0.84579700 | -1.90091400 |
| H  | 1.79729600  | -0.53115400 | -0.86896300 |
| H  | 2.08686500  | -1.07800700 | 0.82671100  |
| H  | 0.27027100  | -2.15426700 | 2.10433700  |
| H  | -1.34686100 | -2.39430000 | 1.34250400  |
| H  | -0.77249800 | -3.20382300 | -2.64376600 |
| H  | 3.12389400  | -2.63869400 | -0.82036200 |
| H  | -0.06549800 | -4.53778000 | 1.42443900  |
| H  | 1.53903600  | -2.23537600 | -2.71859700 |
| H  | 1.63114300  | -3.97066800 | -2.38147000 |
| H  | 2.24473900  | -3.56909200 | 1.33522600  |
| H  | 2.05406100  | -4.77091900 | 0.05146300  |
| H  | -1.64385500 | -4.11969400 | -0.47783100 |
| H  | -0.28256100 | -5.10383000 | -1.03760000 |
| Cl | 1.90075300  | 2.87226900  | -1.53695300 |
| Br | -1.87609600 | 0.67512500  | 1.47948800  |

28

Energy -3721.08578127

|    |             |             |             |
|----|-------------|-------------|-------------|
| C  | 0.48605800  | -0.92678500 | -0.33063500 |
| C  | -0.66219100 | -1.38815900 | -1.19523800 |
| C  | 1.81375300  | -1.03149000 | -1.02957000 |
| C  | 0.49716900  | -1.56793900 | 1.03522500  |
| C  | -0.43818800 | -2.91117500 | -1.42922300 |
| C  | 2.03822000  | -2.55904500 | -1.26971600 |
| C  | 0.71636900  | -3.09017200 | 0.79110900  |
| C  | 0.90489500  | -3.11016000 | -2.14586700 |
| C  | 2.06188500  | -3.29045600 | 0.07972900  |
| C  | -0.42882800 | -3.63408600 | -0.07473600 |
| I  | 0.06820000  | 1.41120900  | 0.07488800  |
| H  | -1.62814400 | -1.22395000 | -0.69705100 |
| H  | -0.66519300 | -0.86025800 | -2.15914300 |
| H  | 1.81139400  | -0.50222500 | -1.99153500 |
| H  | 2.63090800  | -0.62713100 | -0.41676300 |
| H  | 1.31471600  | -1.16847900 | 1.65241900  |
| H  | -0.45589800 | -1.40777700 | 1.55815900  |
| H  | -1.26602400 | -3.28135500 | -2.05381100 |
| H  | 3.00650600  | -2.66797000 | -1.78296300 |
| H  | 0.72291400  | -3.58957300 | 1.77212800  |
| H  | 0.89426900  | -2.59847300 | -3.12087700 |
| H  | 1.07270700  | -4.18145300 | -2.34219600 |
| H  | 2.88416400  | -2.90784000 | 0.70597700  |
| H  | 2.24640200  | -4.36490000 | -0.08153300 |
| H  | -1.39327300 | -3.48895900 | 0.43944600  |
| H  | -0.30063900 | -4.71727300 | -0.22901200 |
| Cl | 2.19554400  | 2.18071600  | -1.06153000 |
| Br | -2.23125400 | 0.75252300  | 1.30778000  |

28

Energy -3721.08332820

|   |             |             |             |
|---|-------------|-------------|-------------|
| C | 0.48864500  | -0.96351500 | -0.32493000 |
| C | -0.31290100 | -1.30569800 | -1.55657700 |
| C | 1.97465700  | -1.07175800 | -0.53538700 |
| C | 0.03100600  | -1.70457600 | 0.90181500  |
| C | -0.03480000 | -2.81085300 | -1.84238600 |
| C | 2.24921400  | -2.58052900 | -0.82935100 |
| C | 0.30431400  | -3.21340200 | 0.61026500  |
| C | 1.46935800  | -3.00326600 | -2.08251200 |
| C | 1.80598300  | -3.41878900 | 0.37596700  |
| C | -0.48783800 | -3.64154600 | -0.63318000 |
| I | 0.02464600  | 1.38801400  | 0.05861700  |
| H | -1.38758500 | -1.14947400 | -1.38425700 |
| H | 0.00165500  | -0.69475600 | -2.41465000 |
| H | 2.31292200  | -0.46227300 | -1.38306600 |
| H | 2.52854600  | -0.75979300 | 0.36213700  |
| H | 0.59199700  | -1.38812400 | 1.79301800  |
| H | -1.03912000 | -1.55574500 | 1.09316200  |
| H | -0.60624400 | -3.09710600 | -2.73923800 |
| H | 3.33182800  | -2.68955900 | -0.99822300 |
| H | -0.03003900 | -3.78359800 | 1.49094400  |
| H | 1.79559700  | -2.40886500 | -2.95100900 |
| H | 1.68029300  | -4.05925500 | -2.31393900 |
| H | 2.37721500  | -3.12937900 | 1.27243600  |
| H | 2.01260100  | -4.48497700 | 0.18873100  |

|    |             |             |             |
|----|-------------|-------------|-------------|
| H  | -1.56816700 | -3.50761900 | -0.46140000 |
| H  | -0.32127000 | -4.71295900 | -0.83073300 |
| Cl | 1.92216800  | 2.08598300  | -1.48064800 |
| Br | -2.10286100 | 0.87777000  | 1.61231900  |

28  
Energy -3721.08605864

|    |             |             |             |
|----|-------------|-------------|-------------|
| C  | 0.43471600  | -0.96289300 | -0.36742400 |
| C  | 0.15386600  | -1.19744000 | -1.83255100 |
| C  | 1.89594300  | -1.10017100 | -0.01270300 |
| C  | -0.45750700 | -1.77505500 | 0.52982300  |
| C  | 0.53133000  | -2.68313200 | -2.10720800 |
| C  | 2.26551500  | -2.58662700 | -0.29698800 |
| C  | -0.08312000 | -3.26666800 | 0.25133300  |
| C  | 2.01624300  | -2.89507700 | -1.78049100 |
| C  | 1.39726500  | -3.49122500 | 0.58749800  |
| C  | -0.34026900 | -3.58851100 | -1.22701100 |
| I  | -0.07734300 | 1.36431400  | -0.01495000 |
| H  | -0.90936600 | -1.03572600 | -2.06140900 |
| H  | 0.76011500  | -0.53300900 | -2.46335600 |
| H  | 2.51768600  | -0.43514900 | -0.62719000 |
| H  | 2.06665800  | -0.86996400 | 1.04886500  |
| H  | -0.29089300 | -1.54313200 | 1.59049400  |
| H  | -1.52024400 | -1.61268200 | 0.30387900  |
| H  | 0.34273100  | -2.88601100 | -3.17297500 |
| H  | 3.33118700  | -2.71903500 | -0.05299800 |
| H  | -0.72173900 | -3.88944400 | 0.89609300  |
| H  | 2.63991300  | -2.24299800 | -2.41241900 |
| H  | 2.30475900  | -3.93592300 | -1.99938700 |
| H  | 1.58318000  | -3.27312800 | 1.65161500  |
| H  | 1.66107300  | -4.54790000 | 0.41868600  |
| H  | -1.40552300 | -3.44209600 | -1.46798700 |
| H  | -0.10228000 | -4.64647400 | -1.42433100 |
| Cl | 1.74109300  | 1.91343900  | -1.71022500 |
| Br | -2.02527300 | 0.93949800  | 1.77514400  |

28  
Energy -3721.06415895

|   |             |             |             |
|---|-------------|-------------|-------------|
| C | 0.79787000  | -1.36134800 | -1.03831200 |
| C | 0.98069400  | -1.65831500 | -2.45797900 |
| C | 1.99215700  | -1.33704800 | -0.20015400 |
| C | -0.44085900 | -1.83045400 | -0.41845100 |
| C | 1.28536000  | -3.23100400 | -2.38619500 |
| C | 2.30594000  | -2.91093600 | -0.12080100 |
| C | -0.13812300 | -3.40592000 | -0.33779700 |
| C | 2.54584700  | -3.43144700 | -1.54026400 |
| C | 1.10787400  | -3.60879000 | 0.52765900  |
| C | 0.07947300  | -3.93206400 | -1.75758300 |
| I | -0.25901100 | 1.66816900  | 0.20885400  |
| H | 0.07753600  | -1.49348700 | -3.05598500 |
| H | 1.83981500  | -1.14439500 | -2.89946500 |
| H | 2.83852300  | -0.82015800 | -0.66431500 |
| H | 1.80490500  | -0.95829300 | 0.81053500  |
| H | -0.60026900 | -1.44572100 | 0.59437100  |
| H | -1.32802000 | -1.67288500 | -1.04140500 |
| H | 1.44322300  | -3.55465700 | -3.42553000 |

|    |             |             |             |
|----|-------------|-------------|-------------|
| H  | 3.20963800  | -3.00170700 | 0.49915600  |
| H  | -1.02816200 | -3.85370900 | 0.12750500  |
| H  | 3.40175500  | -2.91372400 | -1.99862200 |
| H  | 2.80011400  | -4.50229600 | -1.50188600 |
| H  | 0.93818900  | -3.21904800 | 1.54245600  |
| H  | 1.31703300  | -4.68591900 | 0.62636200  |
| H  | -0.82169700 | -3.76962700 | -2.36828400 |
| H  | 0.25641700  | -5.01899800 | -1.72484100 |
| Cl | 1.22055100  | 1.60444200  | -1.96689100 |
| Br | -1.75265300 | 1.48011800  | 2.43738600  |

28

Energy -3721.09804327

|    |             |             |             |
|----|-------------|-------------|-------------|
| C  | 1.18851400  | -1.36166200 | -1.63302800 |
| C  | 1.93187000  | -1.87024900 | -2.86483600 |
| C  | 2.03459400  | -1.53398800 | -0.37691400 |
| C  | -0.16290400 | -2.05180500 | -1.48952900 |
| C  | 2.18738200  | -3.38243000 | -2.66806900 |
| C  | 2.28914300  | -3.04561100 | -0.18342000 |
| C  | 0.09473200  | -3.56226400 | -1.29180900 |
| C  | 3.03839800  | -3.59793700 | -1.40640400 |
| C  | 0.94269200  | -3.77135600 | -0.02624500 |
| C  | 0.84259600  | -4.11133600 | -2.51749300 |
| I  | -0.56929500 | 1.40929500  | 0.42779600  |
| H  | 1.32653500  | -1.70070900 | -3.76783100 |
| H  | 2.88391000  | -1.33157600 | -2.98309300 |
| H  | 2.98686500  | -0.99310500 | -0.48439200 |
| H  | 1.50483100  | -1.12122500 | 0.49530200  |
| H  | -0.70850500 | -1.63854700 | -0.62759400 |
| H  | -0.77002300 | -1.87829300 | -2.39047700 |
| H  | 2.72236000  | -3.76148400 | -3.55320700 |
| H  | 2.89683400  | -3.18214500 | 0.72474900  |
| H  | -0.87642100 | -4.06966300 | -1.18407900 |
| H  | 4.01354300  | -3.09607400 | -1.51391000 |
| H  | 3.23754000  | -4.67306500 | -1.26897900 |
| H  | 0.40732900  | -3.38245500 | 0.85543600  |
| H  | 1.11151300  | -4.84739000 | 0.14047200  |
| H  | 0.23388000  | -3.97106200 | -3.42612600 |
| H  | 1.01408200  | -5.19375900 | -2.40283100 |
| Cl | 0.89278400  | 0.47062800  | -1.90177000 |
| Br | -1.85742100 | 2.30685500  | 2.45406600  |
